# Supplementary material for: An Inventory of South African Medicinal Plants Used in the Management of Sexually Transmitted and Related Opportunistic Infections: An Appraisal and Some Scientific Evidence (1990–2020)
Source: MDPI journal article supplement (doi:10.3390/plants11233241), 2022-11-25
Supplement: s1 [file s1]

**Supplementary File:** Table S1: South African medicinal plants used in the treatment and management of sexually transmitted infections and related opportunistic infections

| Family                | Medicinal plants                                | Growth form | Plant part used, and Vernacular names                                                                                 | Mode of preparation         | Main, related use(s) and references                                 | Number of mentions |
|-----------------------|-------------------------------------------------|-------------|-----------------------------------------------------------------------------------------------------------------------|-----------------------------|---------------------------------------------------------------------|--------------------|
| <b>Acanthaceae</b>    | <i>Blepharis diversispina</i> (Nees) C.B.Clarke | H           | Roots; Mookapitsi (S)                                                                                                 | Boiled and taken orally     | Various unidentified STIs, chlamydia and “makgoma” [19, 59].        | 2                  |
|                       | <i>Blepharis subvolubilis</i> C.B.Clarke        | H           | Whole plant; Eyelash Flower (E)                                                                                       | Not mentioned               | Various unidentified STIs [87]                                      | 1                  |
| <b>Amaranthaceae</b>  | <i>Alternanthera pungens</i> Kunth              | H           | Roots; Motsweetswee (S); Tshehlo (S); Burweed (E); Dubbeltjie (A); Ikhungele (Z); Kahkikweek (A); Kakiedubbeltjie (A) | Boiled and taken orally     | Gonorrhoea [45, 78, 79, 83, 65].                                    | 5                  |
|                       | <i>Amaranthus spinosus</i> L.                   | H           | Fresh leaves; Thepe (S); Sere Pelele (S); Spiny amaranth (E); Needle Burr (E); Soldier Weed (E)                       | Immersed in water and drunk | General opportunistic infections associated with HIV-AIDS [57, 58]. | 2                  |
|                       | <i>Gomphrena celosioides</i> Mart.              | H           | Leaves; Lepolomo la naga (S); Makunye (S); Globe Amaranth (E); Intandangulube (Z); Kakie-onkruid (A); Knopamarant (A) | Boiled and taken orally     | Various unidentified STIs [41].                                     | 1                  |
| <b>Amaryllidaceae</b> | <i>Ammocharis coranica</i> (Ker Gawl.) Herb.    | H           | Roots; Icukudo (Z); Incukudwane (Z); Umbhodiya (Z); Boka (S);                                                         | Boiled and taken orally     | Impotence [ 46, 81].                                                | 2                  |

|                      |                                                 |   |                                                                                                        |                           |                                                         |   |
|----------------------|-------------------------------------------------|---|--------------------------------------------------------------------------------------------------------|---------------------------|---------------------------------------------------------|---|
|                      |                                                 |   | Berg Lily (E); Ground Lily (E); Sore-eye flower (E);                                                   |                           |                                                         |   |
|                      | <i>Boophane disticha</i> (L.f.)<br>Herb.        | H | Whole plant; century plant (E); Gifbol (A); Motlatsisa (S); Incumbe (Z); incotho, Incwadi (X, Z)       | Boiled and taken orally   | Hepatitis B [73].                                       | 1 |
|                      | <i>Clivia miniata</i> (Lindl.)<br>Bosse         | H | Bulbs; Boslelie (A); Clivia (E); Fire Lily (E); September Lily (E); Ubuhlungu-beyimba (Z); Umayime (Z) | Not mentioned             | Opportunistic infections associated with HIV-AIDS [75]. | 1 |
|                      | <i>Cyrtanthus obliquus</i> (L.f.) Aiton         | H | Bulbs; Umathunga (X); Knysna lily (E); Knysnalelie (A); Umathaga (Z)                                   | Boiled and taken orally.  | Various unidentified STIs [39, 40].                     | 2 |
|                      | <i>Gethyllis namaquensis</i> (Schönland) Oberm. | H | Bulbs; Nak tsa tholo (S)                                                                               | Not mentioned             | Gonorrhoea [80, 84].                                    | 2 |
|                      | <i>Tulbaghia acutiloba</i> Harv.                | H | Whole plant; Itsweli (Z); Isivimbampunzi (Z); Ishalati lezinyoka (Z); Isihaqa(Z)                       | Not mentioned             | Impotence [61].                                         | 1 |
| <b>Anacardiaceae</b> | <i>Harpephyllum caffrum</i> Bernh.              | T | Stem bark; Ungwenya (Z); Sour plum (E); Suurbessie (A); Suurpruim (A); Umgwenya (X)                    | Boiled and taken orally   | Gonorrhoea [39,40].                                     | 2 |
|                      | <i>Lannea discolor</i> (Sond.) Engl.            | T | Roots; Bakhout (A); Isiganganyane (Z); Live-long (E); Mokgôkgôthwane (S); Munii (Tsh),                 | Root is infused and drunk | Impotence for both men and women [53].                  | 1 |

|  |                                                                                    |   |                                                                                                                                           |                                                |                                                                    |   |
|--|------------------------------------------------------------------------------------|---|-------------------------------------------------------------------------------------------------------------------------------------------|------------------------------------------------|--------------------------------------------------------------------|---|
|  | <i>Lannea schweinfurthii</i> (Engl.) Engl. var. <i>stuhlmannii</i> (Engl.) Kokwaro | T | Root bark; Bakhout (A); Bastard Marula (E); False Marula (E); Mmopu (S); Mulivhadza (TSH); Tree Grape (E); Umganunkomo (Z); Bolebatsa (S) | Boiled and taken orally                        | Various unidentified STIs [49].                                    | 1 |
|  | <i>Ozoroa paniculosa</i> (Sond.) R.Fern. & A.Fern.                                 | T | Roots; Monoko (S); Resin tree (E); Gewone Harpuisboom (A); Isifice (Z); Isifuku (X); Monyêladiatla (S); Mubandulakhali (Tsh)              | Boiled and taken orally                        | Various unidentified STIs [41].                                    | 1 |
|  | <i>Mangifera indica</i> L.                                                         | T | Roots; Momango (S); Mango (E)                                                                                                             | Not mentioned                                  | A root decoction is drunk to treat various unidentified STIs [53]. | 1 |
|  | <i>Ozoroa engleri</i> R. Fern. & A. Fern.                                          | T | Roots; Mudumbula (Tsh); Isifice (Z); Drooping Resin Tree (E); Treur-harpusboom (A)                                                        | Ground and boiled in water, used as mouth wash | Opportunistic infections associated with HIV-AIDS [44, 57].        | 2 |
|  | <i>Ozoroa paniculosa</i> (Sond.) R.Fern. & A.Fern.                                 | T | Roots; Bushveld ozoroa (E); Isifice (Z); Monoko (S); Mudumbula (Tsh); Common Resin Tree (E); Monyêladiatla (S); Mubandulakhali (Tsh)      | Not mentioned                                  | Various unidentified STIs and impotence [65].                      | 1 |
|  | <i>Ozoroa sphaerocarpa</i> R. Fern. & A. Fern.                                     | T | Stem bark; Monoko (S); Currant Resin Tree (E); Isifice (Z); Resin Tree (E); Tar Berry (E)                                                 | Pounded and taken orally                       | Impotence [81].                                                    | 1 |

|                   |                                                                                   |    |                                                                                                            |                                                  |                                                                                                                                    |   |
|-------------------|-----------------------------------------------------------------------------------|----|------------------------------------------------------------------------------------------------------------|--------------------------------------------------|------------------------------------------------------------------------------------------------------------------------------------|---|
|                   | <i>Sclerocarrya birrea</i> (A.Rich.) Hochst. subsp. <i>caffra</i> (Sond.) Kokwaro | T  | Stem bark; Morula (S); Umganu (Z); Cider tree (E); Marula (E), Moroelaboom (A), Maeroola (A); Mufula (Tsh) | Boiled and taken orally                          | Various unidentified STIs, gonorrhoea, impotence and as an immune booster for patients with HIV-AIDS [19, 46, 65, 80, 82, 83, 85]. | 7 |
|                   | <i>Searsia lancea</i> (L.f.) F.A.Barkley                                          | T  | Roots; Moklabata (S); Karee (E); Karee (A)                                                                 | Not mentioned                                    | “Nta-shete” [80, 83].                                                                                                              | 2 |
| <b>Annonaceae</b> | <i>Annona senegalensis</i> Pers.                                                  | SH | Roots; Muembe (Tsh)                                                                                        | Boiled and taken orally until infections subside | Impotence, syphilis, and chlamydia [50, 54, 75, 85, 95].                                                                           | 5 |
|                   | <i>Artabotrys brachypetalus</i> Benth.                                            | T  | Roots; Mudzidzi, Munnamutswu (Tsh); Monnamoso (S)                                                          | Boiled and taken orally, may also be licked      | Impotence for men [50].                                                                                                            | 1 |
|                   | <i>Hexalobus monopetalus</i> (A.Rich.) Engl. & Diels                              | SH | Roots; Baboon's Breakfast (E); Bastersuikerappel (A); Mowedika (S); Muhuhuma (Tsh); Shakama Plum (E)       | Boiled and taken orally                          | Impotence in men [49, 53].                                                                                                         | 2 |
| <b>Apiaceae</b>   | <i>Arctopus echinatus</i> L.                                                      | H  | Roots; Bear's Foot (E); Octopus (E); Poxthorn (E); Bitterwortel (A); Platannadoring (A)                    | Boiled and taken orally                          | Various unidentified STIs [90].                                                                                                    | 1 |
|                   | <i>Arctopus monacanthus</i> Carmich. ex Sond.                                     | H  | Roots; Platannadoring (A); Bear's Foot (E)                                                                 | Boiled and taken orally                          | Syphilis and gonorrhoea [30, 93].                                                                                                  | 2 |
|                   | <i>Centella asiatica</i> (L.) Urb.                                                | H  | Whole plant; Bolilabalinku (S); Ibdiab                                                                     | Not mentioned                                    | Various unidentified STIs, syphilis [62, 90, 94].                                                                                  | 3 |

|                    |                                                           |    |                                                                                                        |                                              |                                                                                                     |           |
|--------------------|-----------------------------------------------------------|----|--------------------------------------------------------------------------------------------------------|----------------------------------------------|-----------------------------------------------------------------------------------------------------|-----------|
|                    |                                                           |    | Pennywort (E); Marsh Pennywort (E); Icudwane (Z), Varkoortjies (A), Waternael (A)                      |                                              |                                                                                                     |           |
|                    | <i>Foeniculum vulgare</i> Mill. var. <i>vulgare</i>       | H  | Leaves; Bobbejaanvinkel (A); Fennel (E); Imbozisa (Z); Vinkel (A); Vinkelbossie (A)                    | Boiled as a used to wash infected body parts | Oral and genital thrush associated with HIV-AIDS [9].                                               | 1         |
|                    | <i>Heteromorpha aborescens</i> (Spreng.) Cham. & Schltdl. | T  | Roots and leaves; Mohlatlabanna (S); Muthathavhanna (Tsh)                                              | Boiled and taken orally, may also be licked  | Impotence in men [50].                                                                              | 1         |
| <b>Apocynaceae</b> | <i>Asclepias fruticosa</i> L.                             | SH | Roots; Tontelbos (A); melkbos (A); ulusinga lwesalukazi (Z); lebeyana (S); modimolo (S)                | Roots are boiled and taken orally            | Impotence in men [46].                                                                              | 1         |
|                    | <i>Carissa bispinosa</i> (L.) Desf. ex Brenan             | SH | Roots; Mothokolo o monnyane (S); Forest num-num (E); Bosnoemnoem (A); Isibethankunzi (Z); Isabetha (Z) | Decoction taken orally                       | Chlamydia [59].                                                                                     | 1         |
|                    | <i>Carissa edulis</i> (Forssk.) Vahl                      | SH | Roots and leaves; Mothokolo (S); Small num-num, (E); Umlugulu (ND); Murungulu (Tsh)                    | Decoction taken orally                       | Various unidentified STIs and body sores associated with HIV-AIDS [19].                             | 1         |
|                    | <i>Catharanthus roseus</i> (L.) G.Don                     | H  | Roots; Lepolomo le le pinki la drop (S); Liluvha (Tsh); Muluvha (Tsh); Madagascar periwinkle           | Decoction taken orally                       | Various unidentified STIs, syphilis, gonorrhoea, chlamydia, genital warts, dropsy and opportunistic | <b>19</b> |

|  |                                                       |    |                                                                                                                               |                                                                    |                                                                                                       |   |
|--|-------------------------------------------------------|----|-------------------------------------------------------------------------------------------------------------------------------|--------------------------------------------------------------------|-------------------------------------------------------------------------------------------------------|---|
|  |                                                       |    | (E); Rosy periwinkle (E);<br>Cape periwinkle (E)                                                                              |                                                                    | infections associated with<br>HIV-AIDS [19, 38, 45, 49-53, 56,<br>60, 62, 64, 65, 71, 77-79, 83, 89]. |   |
|  | <i>Ceropegia purpurascens</i><br>K.Schum.             | H  | Roots; Monamela (S)                                                                                                           | Boiled and<br>taken orally                                         | Impotence in men [81].                                                                                | 1 |
|  | <i>Gomphocarpus<br/>fruticosus</i> (L.)<br>W.T.Aiton  | SH | Roots; Motsoshapoo (S);<br>Cotton milkweed (E);<br>Firesticks (E); Tontel (A);<br>Tontelbossie (A);<br>Usingalwesalukazi (Z)  | Boiled and<br>taken orally                                         | Impotence in men [65, 71, 78,<br>81].                                                                 | 4 |
|  | <i>Hollarhena pubescens</i><br>Wall. Ex. G.Don        | SH | Roots; Fever-pod (E);<br>Khatha-khathane (Tsh)                                                                                | Decoction<br>drunk twice per<br>day until<br>infection<br>subsides | Gonorrhoea [53].                                                                                      | 1 |
|  | <i>Hoodia gordonii</i><br>(Masson) Sweet ex<br>Decne. | SH | Stem bark; Bitterghaap<br>(A); Bobbejaanghaap (A);<br>Jakkalsghaap (A)                                                        | Not mentioned                                                      | Mouth ulcers associated with<br>HIV-AIDS [43].                                                        | 1 |
|  | <i>Raphionacme hirsuta</i><br>(E.Mey.) R.A.Dyer       | H  | Bulb; Tshengwa (S); False<br>gentian (E); Intsema (X);<br>Khadi (A); Khadiwortel<br>(A); Umathangane (Z);<br>Umathanjana (Z)  | Not mentioned                                                      | Unidentified STIs [19].                                                                               | 1 |
|  | <i>Rauvolfia caffra</i> Sond.                         | T  | Roots; Unadzi (TSH);<br>Muraldi (Tsh); Quinine<br>Tree (E); Umhlambamanzi<br>(Z); Umhlambamaze (Z);<br>Umjele (X); Umjelo (X) | Not mentioned                                                      | Unidentified STIs [5, 18].                                                                            | 2 |

|                       |                                                                     |    |                                                                                                                                  |                                                         |                                                                                                                              |   |
|-----------------------|---------------------------------------------------------------------|----|----------------------------------------------------------------------------------------------------------------------------------|---------------------------------------------------------|------------------------------------------------------------------------------------------------------------------------------|---|
|                       | <i>Sarcostemma viminalis</i> (L.) R.Br.                             | C  | Roots; Mokwekwere o mogolo (S); Moraro (S)                                                                                       | Not mentioned                                           | opportunistic infections associated with HIV-AIDS [80, 83].                                                                  | 2 |
|                       | <i>Tabernaemontana elegans</i> Stapf                                | T  | Roots and leaves; Muhatu (Tsh); Umkhadlu (Z); Toad Tree (E)                                                                      | Roots boiled in water, taken orally                     | Mouth ulcers associated with HIV-AIDS and gonorrhoea [44, 49, 57].                                                           | 3 |
|                       | <i>Wrightia natalensis</i> Stapf.                                   | T  | Roots and stem bark; Musunzi (Tsh); Musunzi (Tsh), Saddle-pod (E)                                                                | Ground into powder and immersed in water, use as gargle | Mouth ulcers associated with HIV-AIDS and impotence [53, 57].                                                                | 2 |
| <b>Araceae</b>        | <i>Zantedeschia aethiopica</i> (L.) Spreng.                         | H  | Roots; Onskelk (A); Arum lily (E); Calla lily (E); Hottentotsblare (A), Hottentotsbrood (A), Ihlukwe (Z), Intebe (Z), Intebe (X) | Not mentioned                                           | Chlamydia [49, 75].                                                                                                          | 2 |
| <b>Araliaceae</b>     | <i>Cussonia paniculata</i> Eckl. & Zeyh. subsp. <i>paniculata</i> . | SH | Stem bark and leaves; Bergkiepersol (A); Mountain Cabbage Tree (E)                                                               | Powdered plant material applied directly to shingles    | Shingles and as immune booster against opportunistic infections associated with HIV-AIDS [9].                                | 1 |
|                       | <i>Cussonia spicata</i> Thunb.                                      | T  | Whole plant; Cabbage Tree (E); Kiepersol (A); Musenzhe (TSH); Umsenge (Z)                                                        | Powdered plant material applied directly to shingles    | Various unidentified STIs, shingles and as immune booster against opportunistic infections associated with HIV-AIDS [9, 95]. | 2 |
| <b>Asclepiadaceae</b> | <i>Xysmalobium undulatum</i> (L.) W.T.Aiton                         | H  | Roots, Ishongwe (Z); Ishinga (Z); Bitterhoutwortel (A); Bitterwortel (A); Iyeza                                                  | Boiled and taken orally                                 | Syphilis [39,40].                                                                                                            | 2 |

|                     |                                             |    |                                                                                                                |                                            |                                                                             |   |
|---------------------|---------------------------------------------|----|----------------------------------------------------------------------------------------------------------------|--------------------------------------------|-----------------------------------------------------------------------------|---|
|                     |                                             |    | Elimhlophe (X);<br>Leshokgoa (S)                                                                               |                                            |                                                                             |   |
| <b>Asparagaceae</b> | <i>Agave americana</i> L.                   | H  | Leaves, American agave (E); American aloe (E); Blougaringboom (E); gareboom (E); kaalgaarboom (A); Lekhala (S) | Sliced and immersed in water, taken orally | Chlamydia, gonorrhoea, and syphilis [51].                                   | 1 |
|                     | <i>Agave sisalana</i> Perrine               | SH | Whole plant, Tshikwenga (Tsh); Sekhophsa sa dintlo (S); agave (E); hemp plant (E)                              | Boiled and taken orally                    | Chlamydia, “makgoma”, gonorrhoea, syphilis, and genital warts [50, 51, 60]. | 3 |
|                     | <i>Asparagus concinnus</i> (Baker) Kies     | SH | Roots, Mphalatsamaru (S); Wild asparagus (E); Haakdoring (A)                                                   | Boiled and taken orally                    | Gonorrhoea [41].                                                            | 1 |
|                     | <i>Asparagus densiflorus</i> (Kunth) Jessop | H  | Leaves, Doringtou (A); Imbelekazana (Z); Isigoba (Z); Thorny Creeper (E); Mphalatsamaru (S)                    | Not mentioned                              | Opportunistic infections associated with HIV-AIDS [9].                      | 1 |
|                     | <i>Asparagus falcatus</i> L.                | H  | Roots; Doringtou (a), Imbelekazana (z), Isigoba (z), Thorny Creeper (E); Asparagus fern (E); Gundakhanga (TSH) | Not mentioned                              | Various unidentified STIs [49].                                             | 1 |
|                     | <i>Drimia alta</i> R.A.Dyer                 | H  | Bulb, Brandui (A); Indongana-zibomvana (Z); Kekanama (S)                                                       | Not mentioned                              | Various unidentified STIs [81].                                             | 1 |
|                     | <i>Merwillia plumbea</i> (Lindl.) Speta     | H  | Bulbs; Blousalngkop (A); Blue Squill (E); Ichitha (Z); Imbizenkulu (Z);                                        | Burnt applied to affected area             | Shingles associated with HIV-AIDS [9, 63].                                  | 2 |



|                      |                                         |    |                                                                                                                                                           |                                           |                                                                                                     |   |
|----------------------|-----------------------------------------|----|-----------------------------------------------------------------------------------------------------------------------------------------------------------|-------------------------------------------|-----------------------------------------------------------------------------------------------------|---|
|                      |                                         |    | Inguduza (Z); Kherere (S),<br>Ubulika (X)                                                                                                                 |                                           |                                                                                                     |   |
|                      | <i>Sansevieria aethiopica</i><br>Thunb. | H  | Whole plant; Bowstring<br>Hemp (A); Kafferwortel<br>(E); Wildewortel (A)                                                                                  | Not mentioned                             | Various unidentified STIs [38,<br>89].                                                              | 2 |
| <b>Asphodelaceae</b> | <i>Aloe arborescens</i> Mill.           | H  | Roots and leaves, Kgopha<br>ya fase (S); Krantz aloe (E);<br>Kransaalwyn (A); Ikalene<br>(X); Inkalane (Z);<br>Umhlabana (Z)                              | Boiled and<br>taken orally                | Opportunistic infections<br>associated with HIV-AIDS [80,<br>82, 83].                               | 3 |
|                      | <i>Aloe chabaudii</i><br>Schönland      | H  | Roots, Tshikhopha (Tsh);<br>Sekgopha (S); Inhlaba (Z);<br>Inkalane (Z)                                                                                    | Not mentioned                             | Various unidentified STIs [50,<br>68].                                                              | 2 |
|                      | <i>Aloe falcata</i> Baker               | SH | Roots, Kgopha (S);<br>Vanhynsdorp aloe (A)                                                                                                                | Not mentioned                             | Syphilis and opportunistic<br>infections associated with<br>HIV-AIDS [80, 83].                      | 2 |
|                      | <i>Aloe ferrox</i>                      | SH | Leaves and roots; Kgopha<br>(S); Inhlaba (Z)                                                                                                              | Not mentioned                             | Opportunistic infections<br>associated with HIV [9, 64, 96].                                        | 3 |
|                      | <i>Aloe marlothii</i><br>A.Berger       | T  | Roots and leaves, Kgopha<br>ya go ema, Seema ka<br>maoto (S); Inhlaba (Z);<br>Umhlaba (Z); Mountain<br>aloe (E); Flat-flowered aloe<br>(E); Bergalwyn (A) | Boiled and<br>taken orally                | Gonorrhoea and opportunistic<br>infections associated with<br>HIV-AIDS [44, 45, 52, 65, 80,<br>83]. | 6 |
|                      | <i>Aloe zebrina</i> Baker               | H  | Roots; Tsikele, Kgophana<br>(S)                                                                                                                           | Not mentioned                             | Various unidentified STIs [19].                                                                     | 1 |
|                      | <i>Bulbine alooides</i> (L.)<br>Willd   | H  | Leaves; Ibhuca (Z);<br>Kopiva (A); Waterpypie<br>(A); Wildekopiva (A)                                                                                     | Sap is applied<br>directly to the<br>skin | Shingles and oral thrush<br>associated with HIV-AIDS [9].                                           | 1 |

|                   |                                              |   |                                                                                              |                                                             |                                           |   |
|-------------------|----------------------------------------------|---|----------------------------------------------------------------------------------------------|-------------------------------------------------------------|-------------------------------------------|---|
|                   | <i>Bulbine angustifolia</i> Poelln.          | H | Roots; Marumo a ngata (S)                                                                    | Boiled and taken orally                                     | Impotence in men [19]. (                  | 1 |
|                   | <i>Bulbine natalensis</i> Baker              | H | Roots and leaves; Geelkopieva (A); Ibhucu (Z); Ibhucu (X); Incelwane (X), Water Glass (E)    | Boiled are drunk three times daily until infection subsides | Various unidentified STIs [90, 91].       | 2 |
| <b>Asteraceae</b> | <i>Ageratum conyzoides</i> (L.) L.           | H | Leaves, Tshidzingambule (Tsh); Goatweed (E); Tropical whiteweed (E)                          | Immersed in water and taken orally                          | Boost immunity in HIV-AIDS patients [54]. | 1 |
|                   | <i>Ageratum houstonianum</i> Mill.           | H | Roots, Munyelenga (Tsh); Blue billygoat weed (E); Bluemink (E)                               | Not mentioned                                               | Gonorrhoea [60].                          | 1 |
|                   | <i>Artemisia annua</i> L.                    | H | Roots, Mohlaswapatla (S); Sweet wormwood (E); Sweet annie (E)                                | Boiled and taken orally                                     | Impotence in men [46, 78, 81].            | 3 |
|                   | <i>Artemisia afra</i> Jacq. ex Willd.        | H | Whole plant; African wormwood (E); Wilde-als (A); Umhlonyane (X); Mhlonyane (Z); Lengana (S) | Boiled and taken orally                                     | Impotence in men [65].                    | 1 |
|                   | <i>Aster bakerianus</i> Burt Davy ex C.A.Sm. | H | Roots; Noxgkekana (X); Udlatshana (Z); Udlutshana (Z), Umaqhunsula (Z), Umhlungwana (Z)      | Boiled and drunk                                            | Unidentified STIs [90, 91].               | 2 |
|                   | <i>Athrixia phyllicoides</i> DC.             | H | Roots, Mutshatshaila (Tsh) Mubosotie (Tsh); Ishanela (Z); Ishayelo (Z); Itshelo              | Not mentioned                                               | Impotence in men [50, 91].                | 2 |

|  |                                                      |   |                                                                                                                                                |                         |                                                                                |   |
|--|------------------------------------------------------|---|------------------------------------------------------------------------------------------------------------------------------------------------|-------------------------|--------------------------------------------------------------------------------|---|
|  |                                                      |   | (Z); Kaffertee (A); Bush tea (E)                                                                                                               |                         |                                                                                |   |
|  | <i>Bidens pilosa</i> L.                              | H | Whole plant, Uqadolo (Z); Blackjack (E)                                                                                                        | Boiled and taken orally | Genital sores and genital warts [44].                                          | 1 |
|  | <i>Callilepis laureola</i> DC.                       | H | Roots; Ox-eye Daisy (E); Wildemargriet (A); Amafuthomhlaba, Ihlamvu, Impila (Z)                                                                | Not mentioned           | Various unidentified STIs [65].                                                | 1 |
|  | <i>Callilepis salicifolia</i> Oliv.                  | H | Tuber, Phelana (S); Ox-eye daisy (E); Wildemargriet (A); Amafuthomhlaba (E); Ihlamvu (E); Impila (Z)                                           | Not mentioned           | Gonorrhoea and opportunistic infections associated with HIV-AIDS [45, 80, 83]. | 3 |
|  | <i>Dicoma anomala</i> Sond.                          | H | Tuber, Fever bush (E); Stomach bush (E); Maagbitterwortel (A); Hloenya (S); mohlasetse (S); inyongana (X); Isihlabamakhondlwane (Z); Umuna (Z) | Boiled and taken orally | Various unidentified STIs [82].                                                | 1 |
|  | <i>Geigeria aspera</i> Harv.                         | H | Whole plant, Makgonatsohle (S); Misbekvermeerbos (A); Vermeerbos (A)                                                                           | Not mentioned           | Opportunistic infections associated with HIV-AIDS [80, 83].                    | 2 |
|  | <i>Helichrysum caespititium</i> (DC.) Sond. ex Harv. | H | Whole plant, Matsana (S); Boriba (S), Botsiki-nyane (S); Lelula-phooko (S); Speelwonderboom (A)                                                | Not mentioned           | Gonorrhoea [45, 65, 80, 83].                                                   | 4 |
|  | <i>Helichrysum kraussii</i> Sch.Bip.                 | H | Roots, Tshifulathulo (Tsh); Isipheshane (Z); Isiqoqo                                                                                           | Not mentioned           | Impotence in men [50].                                                         | 1 |

|  |                                                       |    |                                                                                                                            |                                                |                                                                                           |   |
|--|-------------------------------------------------------|----|----------------------------------------------------------------------------------------------------------------------------|------------------------------------------------|-------------------------------------------------------------------------------------------|---|
|  |                                                       |    | (Z); Sewejaartjie (A); Straw everlasting (E)                                                                               |                                                |                                                                                           |   |
|  | <i>Kleinia longifolia</i> Haw.                        | H  | Roots, Lekgabolo (S); Chimanimani kleinia (E); Chimanimani-kleinia (A)                                                     | Not mentioned                                  | Various unidentified STIs and chlamydia [56, 80, 83].                                     | 3 |
|  | <i>Pechuel-loeschea leubnitziae</i> (Kuntze) O.Hoffm. | SH | Roots; Bitterbossie (A); Stinkbossie (A); Stinkbush (E)                                                                    | Powdered plant material licked by tongue.      | Impotence in men [53].                                                                    | 1 |
|  | <i>Platycarpha glomerata</i> (Thunb.)                 | H  | Leaves and roots; Usiphahluka (Z)                                                                                          | Not mentioned                                  | Various unidentified STIs associated with females and “Isipatsholo” [62, 64].             | 2 |
|  | <i>Schkuhria pinnata</i> (Lam.) Kuntze ex Thell.      | H  | Whole plant; Luswielo (Tsh)                                                                                                | Boiled and taken orally                        | Gonorrhoea and opportunistic infections associated with HIV-AIDS [54, 57].                | 2 |
|  | <i>Senecio serratuloides</i> DC.                      | H  | Whole plant, Unsukumbili (Z); Ichazampukane (Z); Two-day Cure (E); Umaphozisa (Z); Umkhuthelo (Z)                          | Boiled, taken orally                           | Various unidentified STIs and opportunistic infections associated with HIV-AIDS [44, 75]. | 2 |
|  | <i>Spilanthes acmella</i> (L.) L.                     | H  | Whole plant, Tshishengelapofu (Tsh); Toothache plant (E); Paracress (E).                                                   | Powdered and soaked in water, taken orally     | Various unidentified STIs [57].                                                           | 1 |
|  | <i>Tagetes minuta</i> L.                              | H  | Leaves, Mushashthuri (Tshiv); khaki bush (E); khaki weed (E) African marigold (E); Kakiebos (A); khakibos (A); Mbanje (ND) | Dried leaves are boiled in water, taken orally | Mouth ulcers associated with HIV-AIDS [57].                                               | 1 |

|                        |                                                   |    |                                                                                                                                                                 |                                  |                                                                                                                      |   |
|------------------------|---------------------------------------------------|----|-----------------------------------------------------------------------------------------------------------------------------------------------------------------|----------------------------------|----------------------------------------------------------------------------------------------------------------------|---|
|                        | <i>Tarchonanthus camphoratus</i> L.               | SH | Leaves, gqeba-elimhlophe (Z); Isiduli-sehlathi (Z); Kleinvaalbos (A); Mathola (X), Mofahlana (S); Moologa (Tsh)                                                 | Leaves infusion is inhaled       | Various unidentified STIs [38, 89].                                                                                  | 2 |
| <b>Balanophoraceae</b> | <i>Sarcophyte sanguinea</i> Sparrm.               | P  | Stem, Umavumbuka (Z); Ihlule (Z); Umavumbuka (Z); Wolwekos (A)                                                                                                  | Boiled, taken orally             | Gonorrhoea and opportunistic infections associated with HIV-AIDS [44].                                               | 1 |
| <b>Basellaceae</b>     | <i>Anredera cordifolia</i> (Ten.) Steenis         | C  | Tuber and seeds; Bridal wreath (E); Cascade creeper (E)                                                                                                         | Crushed and boiled, taken orally | Chlamydia, gonorrhoea, syphilis and genital warts and opportunistic infections associated with HIV-AIDS [5, 51, 71]. | 3 |
| <b>Bignoniaceae</b>    | <i>Jacaranda mimosifolia</i> D.Don                | T  | Stem bark and leaves; Mudzhagarannnda (Tsh)                                                                                                                     | Crushed and boiled, taken orally | Gonorrhoea [51, 60].                                                                                                 | 1 |
|                        | <i>Kigelia africana</i> (Lam.) Benth.             | T  | Pods, leaves and Stem bark, Umvongothi (Z)                                                                                                                      | Boiled and taken orally          | Syphilis, opportunistic infections associated with HIV-AIDS [44, 51, 95, 90, 91].                                    | 5 |
| <b>Bombaceae</b>       | <i>Adansonia digitata</i> L.                      | T  | Stem bark, Muvhuyu (Tsh)                                                                                                                                        | Not mentioned                    | Various unidentified STIs [50, 68-70].                                                                               | 4 |
| <b>Brassicaceae</b>    | <i>Boscia albitrunca</i> (Burch.) Gilg & Benedict | T  | Roots, Mohlopi (S); Caper bush (E); Coffee tree (E); Koffie (A); Groot-witgat (A); Koffieboom (A); Umpunzito (X); Umtopi (ND); Isinama (Z); Inyokiziphinda (Z). | Boiled and taken orally          | Opportunistic infections associated with HIV-AIDS [80, 82, 83].                                                      | 3 |

|                    |                                                                |    |                                                                                                                                 |                                  |                                                                                                                                                                 |    |
|--------------------|----------------------------------------------------------------|----|---------------------------------------------------------------------------------------------------------------------------------|----------------------------------|-----------------------------------------------------------------------------------------------------------------------------------------------------------------|----|
|                    | <i>Maerua edulis</i> (Gilg & Gilg-Ben.) DeWolf                 | SH | Roots, Mutshalimela (TSH); Sozwe Tree (E); Bush-cherry (E); Inswaniswani (Z)                                                    | Not mentioned                    | Various unidentified STIs [76].                                                                                                                                 | 1  |
| <b>Burseraceae</b> | <i>Commiphora africana</i> (A.Rich.) Engl. Var <i>africana</i> | SH | Roots; Hairy Corkwood (E); Harige Kanniedood (A); Iminyela (Z); Morôka (S); Mothapô (S); Ozidlaxo (Z), Poison-grub Corkwood (E) | Not mentioned                    | Impotence in men [53].                                                                                                                                          | 1  |
|                    | <i>Commiphora merkeri</i> Engl.                                | SH | Roots, Mutonyombidi (Tsh); Ringbas-kanniedood (A); Zebra tree (E); Zebra-bark Corkwood (E)                                      | Crushed and boiled, taken orally | Impotence in men [50].                                                                                                                                          | 1  |
|                    | <i>Commiphora viminea</i> Burt. Davy                           | T  | Roots; Mutonyombidi (Tsh); Ringbas-kanniedood (A); Zebra Tree (E); Zebra-bark Corkwood (E); Zebrabas-kanniedood (A)             |                                  | Impotence [53].                                                                                                                                                 | 1  |
| <b>Cactaceae</b>   | <i>Opuntia ficus-indica</i> (L.) Mill.                         | SH | Roots, Motloro, Tlorofeile (S); Mudoro (Tsh); Barbary fig (E); Cactus pear (E); Prickly pear (E)                                | Boiled and taken orally          | Various unidentified STIs, chlamydia, gonorrhoea, syphilis, gonorrhoea, "makgoma", shingles arising from HIV-AIDS and drop [19, 45, 50-53, 65, 78, 79, 82, 83]. | 11 |
|                    | <i>Opuntia stricta</i> (Haw.) Haw.                             | SH | Roots and stem, Umdolofiya (Z); Tlorofeile (S); Mudoro (Tsh)                                                                    | Boiled, taken orally             | Gonorrhoea and genital warts [44, 51].                                                                                                                          | 2  |

|                        |                                                            |    |                                                                                                                                                  |                                                                         |                                                                                                                                                    |    |
|------------------------|------------------------------------------------------------|----|--------------------------------------------------------------------------------------------------------------------------------------------------|-------------------------------------------------------------------------|----------------------------------------------------------------------------------------------------------------------------------------------------|----|
| <b>Canellaceae</b>     | <i>Warburgia salutaris</i> (G.Bertol.) Chiov.              | T  | Roots and stem bark, Mulanga (Tsh); Manakha (Tsh); Isibaha (Z); Amazwecehlabayo (Z); Molaka (S); Fever tree (E); Koorsboom (A); Peperbasboom (A) | Boiled, taken orally                                                    | Various unidentified STIs, impotence and mouth ulcers associated with HIV-AIDS [49, 50, 57, 76, 90, 91, 94]                                        | 7  |
| <b>Cannabaceae</b>     | <i>Cannabis sativa</i> L. var. <i>indica</i> (Lam.) Wehmer | H  | Whole plant; Dagga (E); Lebake (S); Patse (S)                                                                                                    | Boiled and taken orally                                                 | Immune booster for HIV-AIDS patients [90].                                                                                                         | 1  |
| <b>Cappariaceae</b>    | <i>Capparis tomentosa</i> Lam.                             | SH | Intsihlo (X); Inkunzi-ebomvu (Z); Umqoqolo (Z); Kapperbos (A); Woolly Caper Bush (E); Woolly Caper-bush (E)                                      | Infusion, steam bath                                                    | “Nta shete” [39, 40, 49].                                                                                                                          | 3  |
|                        | <i>Cladostemon kirkii</i> (Oliv.) Pax & Gilg               | T  | Roots, Isidumbu (Z); Umthekwini (Z); iyamuka (Z); Drievingerbos (A); Three-finger bush (E)                                                       | Decoction taken orally                                                  | Various unidentified STIs [44].                                                                                                                    | 1  |
| <b>Caricaceae</b>      | <i>Carica papaya</i> L.                                    | T  | Roots and fruits, Mophoophoo (S), Mupapawe (Tsh), Upopo (Z)                                                                                      | Roots boiled and taken orally; Unripe fruits are squeezed for impotence | Various unidentified STIs, gonorrhoea and impotence [44-46, 50, 56, 59, 65, 78, 79, 81, 83] Roots may also be used to treat oral candidiasis [57]. | 12 |
| <b>Caryophyllaceae</b> | <i>Krauseola mosambicina</i> Pax & Hoffm.                  | H  | Whole plant, Isihlaza (Z)                                                                                                                        | Decoction taken orally                                                  | Unidentified STIs and sores [44].                                                                                                                  | 1  |
| <b>Casuarinaceae</b>   | <i>Casuarina cunninghamiana</i> Miq.                       | T  | Flowers, Musanana (Tsh); River Sheoak (E); Origin Vic (E)                                                                                        | Not mentioned                                                           | Gonorrhoea [60]                                                                                                                                    | 1  |

|                     |                                                          |    |                                                                                                                                      |                                           |                                                                                                                               |   |
|---------------------|----------------------------------------------------------|----|--------------------------------------------------------------------------------------------------------------------------------------|-------------------------------------------|-------------------------------------------------------------------------------------------------------------------------------|---|
| <b>Crassulaceae</b> | <i>Bryophyllum delagoense</i> (Eckl. & Zeyh.) Druce      | SH | Leaves, Mutungupfa (Tsh)                                                                                                             | Not mentioned                             | Gonorrhoea [60].                                                                                                              | 1 |
|                     | <i>Bryophyllum pinnatum</i> (Lam.) Oken                  | SH | Leaves, Umvuthi (Z); Mother-in-law (E); Leaf of Life (E); Wonder of the world (E)                                                    | Boiled and taken orally                   | Gonorrhoea [44].                                                                                                              | 1 |
| <b>Celestraceae</b> | <i>Cassine transvaalensis</i> (Burt Davy) Codd           | T  | Stem bark; Mulumanamana (TSH); Mukuvhazwivhi (TSH); Transvaal saffron (E); Umgugudo (Z)                                              | Not mentioned                             | Various unidentified STIs [76].                                                                                               | 1 |
|                     | <i>Catha edulis</i> (Vahl) Endl.                         | SH | Roots, Lehwane (S); Mohlatse (S); Bushman's Tea (E); Igqwaka (X), Inandinandi (ND); Khat (E); Khat (A); Luthadzi (Tsh); Lwani (Tsh); | Boiled and taken orally                   | Impotence [63, 81].                                                                                                           | 2 |
|                     | <i>Elaeodendron transvaalense</i> (Burt Davy) R.H.Archer | T  | Stem bark and roots, Monamane (S), Mukuvhazwivhi, Mulumanamana (Tsh)                                                                 | Boiled and taken orally and as mouth wash | Various unidentified STIs and opportunistic infections associated with HIV-AIDS, oral thrush [5, 19, 50, 53, 58, 75, 80, 82]. | 8 |
|                     | <i>Gymnospora senegalensis</i> (Lam.) Loes.              | H  | Root bark and leaves; Mophato (S); Rooidoring (A); Rooi-pendoring (A); Tshibavhe (Tsh); Tshiphandwa (Tsh); Ubuhlangwe (Z)            | Boiled and taken orally                   | Management of opportunistic infections associated with HIV-AIDS and impotence [19, 81].                                       | 2 |



|                     |                                                         |    |                                                                                                             |                                     |                                                                      |   |
|---------------------|---------------------------------------------------------|----|-------------------------------------------------------------------------------------------------------------|-------------------------------------|----------------------------------------------------------------------|---|
|                     | <i>Hippocratea longipetiolata</i> Oliv.                 | SH | Roots, Mutshaliri (Tsh)                                                                                     | Boiled and taken orally             | Opportunistic infections associated with HIV-AIDS, oral thrush [57]. | 1 |
| <b>Clusiaceae</b>   | <i>Garcinia livingstonei</i> T.Anderson                 | SH | Roots; Muphiphi (Tsh); African Mangosteen (E); Lowveld Mangosteen (E); Wild Plum (E); Umphimbi (Z)          | Not mentioned                       | Impotence men [50, 53, 95].                                          | 3 |
| <b>Combretaceae</b> | <i>Combretum caffrum</i> (Eckl. & Zeyh.) Kuntze         | T  | Roots; Cape Bushwillow (E); Rooiblaar (A); Rooiblad (A); Umdubu (Z); Vaderlandwilgerboom (A)                | Not mentioned                       | Unidentified STIs [91].                                              | 1 |
|                     | <i>Combretum molle</i> R.Br. ex G.Don                   | T  | Leaves and roots, Umbondo (Z); Mohwelere (S); Mugwiti (Tsh), Velvet bushwillow (E)                          | Boiled and taken orally             | Various unidentified STIs [44, 49].                                  | 2 |
|                     | <i>Combretum paniculatum</i> Vent.                      | T  | Roots, Mukopokopo (Tsh)                                                                                     | Not mentioned                       | Various unidentified STIs [49, 50].                                  | 2 |
|                     | <i>Combretum vendae</i> A.E .van Wyk var. <i>vendae</i> | SH | Roots, gopokopobani (TSH); lugwiti(TSH); Vendabushwillow (E); Vendaboswilg(A)                               | Dried roots are pounded and licked. | Impotence in men [53].                                               | 1 |
|                     | <i>Terminalia prunioides</i> M.A.Lawson                 | T  | Stem bark; Hardekoolboom (A); Lowveld Cluster-leaf (E); Lowveld Terminalia (E); Mutsiara (S); Mutwari (Tsh) | Not mentioned                       | Various unidentified STIs [57].                                      | 1 |

|                       |                                           |   |                                                                                                                                                                            |                                                    |                                                                                                                                                                                      |   |
|-----------------------|-------------------------------------------|---|----------------------------------------------------------------------------------------------------------------------------------------------------------------------------|----------------------------------------------------|--------------------------------------------------------------------------------------------------------------------------------------------------------------------------------------|---|
|                       | <i>Terminalia sericea</i><br>Burch ex DC. | T | Stem bark and roots;<br>Monakanakane (S);<br>Imkhonono (Z); Assegai<br>Wood (E); Bloubos (A);<br>Bosvaalbos (A);<br>Moxonono (S); Mususu<br>(TSH), Sand Yellow Wood<br>(E) | Boiled and<br>taken orally                         | Various unidentified STIs,<br>impotence and opportunistic<br>infections associated with<br>HIV-AIDS including internal<br>and external sores [5, 19, 38,<br>41, 44, 50, 53, 65, 89]. | 9 |
| <b>Commelinaceae</b>  | <i>Commelina eckloniana</i><br>Kunth      | H | Whole plant, Umkhonto<br>(Z)                                                                                                                                               | Boiled and<br>drunk until<br>infection<br>subsides | Gonorrhoea [62, 64].                                                                                                                                                                 | 2 |
|                       | <i>Cyanotis speciosa</i> (L.f.)<br>Hassk. | H | Whole plant; Ingonga (Z);<br>Inkombo (z); Insonga (z);<br>Job's Tears (E); Ndou<br>Muhulu (Tsh);<br>Umagoswana (X);<br>Umakhothigobile (Z);<br>Wandering Jew (E)           | Boiled and<br>taken orally                         | Gonorrhoea [62, 64].                                                                                                                                                                 | 2 |
| <b>Convolvulaceae</b> | <i>Ipomoea batatas</i> (L.)<br>Lam.       | H | Leaves; Ubhatata (Z)                                                                                                                                                       | Boiled and<br>taken orally                         | Gonorrhoea [44].                                                                                                                                                                     | 1 |
|                       | <i>Ipomoea bolusiana</i><br>Schinz        | H | Bulb; Mokutu (S); Seakhoe<br>(S); Narrow-leaved pink<br>Ipomoea (E); Morning<br>glory (E)                                                                                  | Boiled and<br>taken orally                         | Various unidentified STIs [19,<br>50, 67].                                                                                                                                           | 3 |
|                       | <i>Ipomoea crassipes</i><br>Hook.         | H | Bulb; Mothokhoana (S);<br>Sekutle (S); Seletjane-se-<br>setona (S); Ubhoqo (Z);<br>Uvimbukhalo (Z);                                                                        | Not mentioned                                      | Opportunistic infections<br>associated with HIV-AIDS<br>[87].                                                                                                                        | 1 |

|                      |                                                     |    |                                                                                                                                                      |                                     |                                             |   |
|----------------------|-----------------------------------------------------|----|------------------------------------------------------------------------------------------------------------------------------------------------------|-------------------------------------|---------------------------------------------|---|
|                      |                                                     |    | Wildepata (A);<br>Wildewinde (A)                                                                                                                     |                                     |                                             |   |
|                      | <i>Ipomoea pellita</i> Hallier f.                   | H  | Tubers; Ubhoqo (Z)                                                                                                                                   | Not mentioned                       | Impotence [62, 64].                         | 2 |
|                      | <i>Ipomoea obscura</i> (L.) Ker Gawl.               | H  | Bulb; Kgomodimaswi (S); Usiboniseleni (Z); Wild petunia (E); Wildepata (A)                                                                           | Not mentioned                       | Gonorrhoea [44, 80, 83].                    | 3 |
| <b>Crassulaceae</b>  | <i>Bryophyllum delagoense</i> (Eckl. & Zeyh.) Druce | SH | Leaves, Mutungupfa (Tsh)                                                                                                                             | Not mentioned                       | Gonorrhoea [60].                            | 1 |
|                      | <i>Bryophyllum pinnatum</i> (Lam.) Oken             | SH | Leaves, Umvuthi (Z); Mother-in-law (E); Leaf of Life (E); Wonder of the world (E)                                                                    | Boiled and taken orally             | Gonorrhoea [44].                            | 1 |
|                      | <i>Crassula muscosa</i> L.                          | H  | Stems and leaves; Lizard's Tail (E)                                                                                                                  | Decoction                           | Mouth ulcers associated with HIV-AIDS [43]. | 1 |
| <b>Cucurbitaceae</b> | <i>Cucumis myriocarpus</i> Naudin                   | H  | Roots, Magapyana (S); Wild Cucumber (E); Gooseberry cucumber (E); Sendelenja (Z); Small wild Melon (E); Streepwildekomkommer (A); Wildekomkommer (A) | Boiled and taken orally             | “Tshofela” and gonorrhoea [45, 79, 83].     | 3 |
|                      | <i>Cucumis zeyheri</i> Sond.                        | H  | Fruit, Monyaku; Wild cucumber (E); itterappel (A); Inhlakahlela (Z); Wild cucumber (E); Wilde-agurkie (A)                                            | Immersed in water and used as enema | Chlamydia [59].                             | 1 |

|                      |                                                     |    |                                                                                                                                                                                               |                                          |                                                                               |   |
|----------------------|-----------------------------------------------------|----|-----------------------------------------------------------------------------------------------------------------------------------------------------------------------------------------------|------------------------------------------|-------------------------------------------------------------------------------|---|
|                      | <i>Citrullus lanatus</i> (Thunb.) Matsum. & Nakai   | H  | Roots; Morotse (S); Kaffir Watermelon (E); Kakoer (A); Koer Koer (A); Koerkoer                                                                                                                | Boiled and taken orally                  | Gonorrhoea and opportunistic infections associated with HIV [65, 79, 83, 94]. | 4 |
|                      | <i>Kedrostis nana</i> (Lam.) Cogn. var. <i>nana</i> | C  | Tubers, Bryony (E); Ystervarkpatats (A)                                                                                                                                                       | Not mentioned                            | Gonorrhoea, Hepatitis B and syphilis [91, 94].                                | 2 |
| <b>Cupressaceae</b>  | <i>Widdringtonia cupressoides</i> (L.) Endl.        | SH | Roots; Thaululo (Tsh)                                                                                                                                                                         | Not mentioned                            | Various unidentified STIs [50].                                               | 1 |
| <b>Curtisiaceae</b>  | <i>Curtisia dentata</i> (Burm.f.) C.A.Sm.           | T  | Stem bark, Modulatshwene (S); Asgaaiboom (A); Assegaai (E); Injundumlahleni (Z); Mufhefhera (Tsh); Musangwe (Tsh); Umguna (X); Umgxina (X); Unhlebe (X); Unlahleni (X); Uphephelelangeni (Z); | Boiled and taken orally                  | Various unidentified STIs, impotence [47, 48, 90].                            | 3 |
| <b>Dioscoreaceae</b> | <i>Dioscorea sylvatica</i> Eckl.                    | H  | Bulb; Setagwa (S); Isidakwa (Z); Forest Elephant's Foot (E)                                                                                                                                   | Not mentioned                            | Gonorrhoea [45, 80, 82].                                                      | 3 |
| <b>Dipsacaceae</b>   | <i>Scabiosa columbaria</i> L.                       | H  | Whole plant, Bitterbos (A); Hlako-ya-pitsi (S); Ibheka (Z); Ilelemimoya (X); Ubucubele (Z), Udoloqina (Z)                                                                                     | Ointment from roots is applied to wounds | Syphilis and gonorrhoea [38, 89].                                             | 2 |
| <b>Dracaenaceae</b>  | <i>Sansevieria hyacinthoides</i> (L.) Druce         | H  | Roots; Makgotse (S); Aambeiwortel (A); Isikholokotho (Z); Isikholokotho (X);                                                                                                                  | Not mentioned                            | Gonorrhoea [80, 83].                                                          | 2 |

|                  |                                                                           |   |                                                                                                                                           |                                                                          |                                                                                                       |   |
|------------------|---------------------------------------------------------------------------|---|-------------------------------------------------------------------------------------------------------------------------------------------|--------------------------------------------------------------------------|-------------------------------------------------------------------------------------------------------|---|
|                  |                                                                           |   | Isikhwendle (Z);<br>Isitokotoko (Z); Mother-in-law's-tongue (E),<br>Skoonma-se-tong (A),<br>Wildedatel (A)                                |                                                                          |                                                                                                       |   |
|                  | <i>Sansevieria trifasciata</i> P<br>rain                                  | H | Roots, Devils tongue (E);<br>Snakees tongue (E); Snake<br>plant (E)                                                                       | Bioled and<br>taken orally                                               | Opportunistic infections<br>associated with HIV-AIDS<br>[65].                                         | 1 |
| <b>Ebenaceae</b> | <i>Diospyros lycioides</i><br>subsp. <i>guerkei</i><br>(Kuntze) De Winter | T | Roots, Bessieboom (A);<br>Jakkalsbessie (A); Muthala<br>(Tsh); Quilted bluebush<br>(E)                                                    | Not mentioned                                                            | Various unidentified STIs [53,<br>75, 87].                                                            | 3 |
|                  | <i>Diospyros mespiliformis</i><br>Hochst. ex A.DC.                        | T | Fruit, Musuma (Tsh);<br>African Ebony (E);<br>Ebbehout (A); Musuma<br>(Tsh); Transvaalebbbehout<br>(A); Umdhlausu (ND),<br>Umdlawuzo (ND) | Crushed and<br>mixed with<br>water, taken<br>orally.                     | Various unidentified STIs,<br>impotence, oral thrush<br>associated with HIV-AIDS [57,<br>84, 86, 88]. | 4 |
|                  | <i>Diospyros whyteana</i><br>(Hiern) P.White                              | T | Leaves, Munya Vhili<br>(Tsh); African bladder nut<br>(E); Black bark (E);<br>Bostolbos (A); Kraaibessie<br>(A)                            | Raw leaves are<br>immersed in<br>water to make<br>tea, Used as<br>douche | Oral thrush associated with<br>HIV-AIDS [57].                                                         | 1 |
|                  | <i>Euclea crispa</i> (Thunb.)<br>Gürke                                    | T | Roots, Mokwerekwere (S);<br>Blue guarri (E);<br>Bosghwarrie (A);<br>Idungamuzi (Z);<br>Mungule-nyele (Tsh);<br>Munyele (Tsh)              | Not mentioned                                                            | Opportunistic infections<br>associated with HIV-AIDS [65,<br>80, 82, 83].                             | 4 |

|                      |                                            |    |                                                                                                                                 |                                          |                                                                          |   |
|----------------------|--------------------------------------------|----|---------------------------------------------------------------------------------------------------------------------------------|------------------------------------------|--------------------------------------------------------------------------|---|
|                      | <i>Euclea natalensis</i><br>A.DC.          | T  | Roots, Mohlakola,(S); Mokgokgono (S); Large-leaved guarri (Eng.); umKhasa (X); inKunzi-emnyama (Z), umHlalanyamazane,(Z).       | Boiled and taken orally                  | Various unidentified STIs, gonorrhoea [38, 41, 50, 61, 88].              | 5 |
| <b>Euphorbiaceae</b> | <i>Alchornea laxiflora</i> Pax & K. Hoffm. | SH | Roots; Lowveld Bead-string (E); Murundamalofha (Tsh); Venda Bead-string (E); Venda-kralesnoer (A)                               | Not mentioned                            | Various unidentified STIs [53].                                          | 1 |
|                      | <i>Croton gratissimus</i><br>Burch.        | SH | Bulb, Mafunyungule (Tsh); Mookgwasane (S); Mufhorola (Tsh); Muthatha-khubi (Tsh); Rekstokbos (A); Stinkhout (A); Uhubeshane (Z) | Crushed, soaked into hot water and drunk | Gonorrhoea, syphilis, Oral thrush associated with HIV-AIDS [38, 57, 82]. | 3 |
|                      | <i>Euphorbia hypericifolia</i><br>L.       | SH | Whole plant, Umaphipha (Z); Graceful spurge (E)                                                                                 | Boiled and taken orally                  | Gonorrhoea [44, 72].                                                     | 2 |
|                      | <i>Euphorbia maleolens</i><br>E.Phillips   | H  | Whole plant, Rofa-bja-tau (S)                                                                                                   | Boiled and taken orally                  | Opportunistic infections associated with HIV-AIDS [65, 80, 83].          | 3 |
|                      | <i>Euphorbia tirucalli</i> L.              | SH | Roots, Umnduze (Z); Motlalamela (S); Mutungu (Tsh); Rubber euphorbia (E); Umhlontlo (X); Umnduze (Z); Umsululu (Z)              | Boiled and taken orally                  | Gonorrhoea and impotence [44, 61].                                       | 2 |
|                      | <i>Jatropha curcas</i> L.                  | SH | Roots and leaves; Sehlare sa banna (S); Mokhure (S);                                                                            | Boiled and taken orally                  | Opportunistic infections associated with HIV-AIDS                        | 1 |

|                 |                                              |    |                                                                                                                                                 |                             |                                                                                                                |   |
|-----------------|----------------------------------------------|----|-------------------------------------------------------------------------------------------------------------------------------------------------|-----------------------------|----------------------------------------------------------------------------------------------------------------|---|
|                 |                                              |    | Barbados nut (E); Bubble bush (E)                                                                                                               |                             | including vaginal candidiasis [81].                                                                            |   |
|                 | <i>Jatropha erythropoda</i> Pax & K.Hoffm.   | H  | Bulb, Thotamadi (S); Rooikambroo (A)                                                                                                            | Boiled and taken orally     | Chlamydia [59].                                                                                                | 1 |
|                 | <i>Jatropha zeyheri</i> Sond.                | H  | Bulb, Sefapabadia (S); Ugodide (Z), Verfbol (A)                                                                                                 | Boiled and taken orally     | Various unidentified STIs, gonorrhoea and “divhu” [19, 45, 53, 65, 66, 80, 83].                                | 7 |
|                 | <i>Ricinus communis</i> L.                   | SH | Whole plant; Mokhure (S); Mupfure (Tsh); Castor oil (E)                                                                                         | Boiled and taken orally     | Chlamydia, gonorrhoea, syphilis, “makgoma” and opportunistic infections associated with HIV-AIDS [51, 52, 60]. | 3 |
|                 | <i>Tragia rupestris</i> Sond.                | H  | Roots; Brandneuker (A); Imbabazane (Z)                                                                                                          |                             | Impotence [53].                                                                                                | 1 |
| <b>Fabaceae</b> | <i>Albizia adianthifolia</i> (Schum.) Wight  | T  | Leaves, Igowane (Z); Umbhelebhele (Z); Umgadankawu (Z); Flat-crown (E); Isicangca (X); Muelela (Tsh); Muombangoma (Tsh)                         | Decoction taken as an enema | Syphilis and impotence [44, 53].                                                                               | 2 |
|                 | <i>Albizia anthelmintica</i> Brongn.         | SH | Roots, Muime (Tsh); Arub (A); Bonthout (A); Cherry-blossom tree (E); Mmola (S); Muime (Tsh); Mukuvhavhadinda (Tsh); Umnala (Z); Umnalahanga (Z) | Not mentioned               | Various unidentified STIs [50].                                                                                | 1 |
|                 | <i>Albizia gummifera</i> (J.F.Gmel.) C.A.Sm. | T  | Stem bark; Umgandakawu (Z)                                                                                                                      | Boiled and taken orally     | Various unidentified STIs [39, 40].                                                                            | 1 |

|  |                                                          |    |                                                                                                                                                            |                                                      |                                                                                                                        |   |
|--|----------------------------------------------------------|----|------------------------------------------------------------------------------------------------------------------------------------------------------------|------------------------------------------------------|------------------------------------------------------------------------------------------------------------------------|---|
|  | <i>Albizia versicolor</i> Oliv.                          | T  | Stem bark; Muvhambabgoma (Tsh); Large-leaved false-thorn (E); Mmola (S); Mohlabafota (S); Mohlalabata (S); Mutamba-pfuna (Tsh), Umphisu (Z); Umvangazi (Z) | Not mentioned                                        | Various unidentified STIs, impotence in men [49, 50].                                                                  | 2 |
|  | <i>Bauhinia galpinii</i> N.E.Br.                         | SH | Roots; Mohohoma (S); Mutswiriri (Tsh)                                                                                                                      | Not mentioned                                        | Various unidentified STIs, impotence [19, 53, 54].                                                                     | 3 |
|  | <i>Bolusanthus speciosus</i> (Bolos) Harms               | SH | Roots and stem; Mukambana (Tsh)                                                                                                                            | Boiled and taken orally                              | Various unidentified STIs and impotence [50, 53, 68-70].                                                               | 5 |
|  | <i>Burkea africana</i> Hook.                             | T  | Roots and seeds; Monatlo (S), Mufhulu (Tsh)                                                                                                                | Both roots and seeds are ground and boiled and drunk | Opportunistic infections associated with HIV-AIDS [53, 57, 58, 80, 83].                                                | 5 |
|  | <i>Caesalpinia decapetala</i> (Roth) Alston.             | SH | Roots; Mokgabane (S)                                                                                                                                       | Boiled and taken orally                              | Impotence and gonorrhoea [45, 53, 65, 78, 79, 83].                                                                     | 6 |
|  | <i>Cassia abbreviata</i> Oliv.                           | SH | Roots and stem bark; Monepenepe, Molomanama (S)                                                                                                            | Boiled and taken orally                              | Various unidentified STIs, chlamydia, impotence, and as immune booster for HIV-AIDS patients [19, 41, 53, 59, 74, 84]. | 6 |
|  | <i>Colophospermum mopane</i> J. Kirk. ex Benth.) Leonard | T  | Roots; Mopane (S)                                                                                                                                          | Boiled and taken orally                              | Impotence [53].                                                                                                        | 1 |
|  | <i>Dalbergia melanoxylon</i> Guill. & Perr.              | T  | Stem bark; African Blackwood (E); African Ebony (E);                                                                                                       | Not mentioned                                        | Various unidentified STIs [49].                                                                                        | 1 |



|  |                                                           |    |                                                                                              |                                                                 |                                                                                                                                                          |    |
|--|-----------------------------------------------------------|----|----------------------------------------------------------------------------------------------|-----------------------------------------------------------------|----------------------------------------------------------------------------------------------------------------------------------------------------------|----|
|  |                                                           |    | Driedoringebbehout (A);<br>Ebbehout (A); Ebony (E);<br>Grenadille Wood (E);<br>Muuluri (Tsh) |                                                                 |                                                                                                                                                          |    |
|  | <i>Dichrostachys cinerea</i><br>L.                        | SH | Roots; Moretshe (S)                                                                          | Not mentioned                                                   | Impotence and syphilis [53, 91].                                                                                                                         | 2  |
|  | <i>Elephantorrhiza burkei</i><br>Benth.                   | H  | Roots, Mohauwane wa<br>thaba, Mositsane (S),<br>Tshisevhufa (Tsh)                            | Applied to<br>infected areas of<br>the skin,<br>decoction drunk | Various unidentified STIs,<br>chlamydia, aphrodisiac,<br>opportunistic infections<br>associated with HIV-AIDS [19,<br>50, 53, 57, 59, 66, 68-70, 80-83]. | 11 |
|  | <i>Elephantorrhiza<br/>elephantina</i> (Burch.)<br>Skeels | H  | Roots, Mohauwane,<br>Mosehlana, Mositsane (S)                                                | Boiled and<br>taken orally                                      | Syphilis, chlamydia,<br>impotence in men [19, 59, 66,<br>75, 81-83, 91].                                                                                 | 8  |
|  | <i>Erythrina caffra</i> Thunb.                            | SH | Roots, Umsisnsi                                                                              | Boiled and<br>taken orally                                      | Various unidentified STIs and<br>genital warts [38, 44].                                                                                                 | 2  |
|  | <i>Eriosema cordatum</i><br>E.Mey.                        | H  | Roots; Leshetla (S);<br>Ubangalala (Z);<br>Umhlabankunzi (Z);<br>Uqonsi (Z); Uqontsi (Z)     | Not mentioned                                                   | Impotence in men [61].                                                                                                                                   | 1  |
|  | <i>Erythrina lysistemon</i><br>Hutch.                     | T  | Stem bark; Muvhale (Tsh)                                                                     | Boiled and<br>taken orally                                      | Impotence in men [54].<br>Ground roots and stem bark<br>boiled and used as mouthwash<br>for oral candidiasis [57].                                       | 2  |
|  | <i>Faidherbia albida</i><br>(Delile) A.Chev.              | T  | Stem bark; Muhoto (S)                                                                        | Not mentioned                                                   | Various unidentified STIs and<br>impotence for men [50, 53].                                                                                             | 2  |
|  | <i>Mundulea sericea</i><br>(Willd.) A.Chev.               | SH | Roots; Maibana, Mohato,<br>Mositatlou (S);<br>Mukandandou (Tsh)                              | Not mentioned                                                   | Impotence for men [50, 53].                                                                                                                              | 2  |

|  |                                                    |   |                                                                                                                                                                                   |                         |                                                                                                                                    |    |
|--|----------------------------------------------------|---|-----------------------------------------------------------------------------------------------------------------------------------------------------------------------------------|-------------------------|------------------------------------------------------------------------------------------------------------------------------------|----|
|  | <i>Ormocarpum trichocarpum</i> (Taub.) Engl.       | T | Roots; Caterpillar Bush (E); Caterpillar Pod (E); Hairy Caterpillar Pod (E); Isithibane (Z); Umsindadlovana (Z); Mosepe (S); Mugogodwane (Tsh), Muthari (Tsh); Rusperboontjie (A) | Not mentioned           | Impotence in men [88].                                                                                                             | 1  |
|  | <i>Peltophorum africanum</i> Sond.                 | T | Roots and stem bark; Mosehla (S); Musese (Tsh)                                                                                                                                    | Boiled and taken orally | Various unidentified STIs, impotence and skin infections associated with HIV-AIDS [19, 44, 49, 50, 57, 65, 66, 68, 75, 76, 80-83]. | 14 |
|  | <i>Piliostigma thonningii</i> (Schum.) Milne-Redh. | T | Roots; Mukolokote (Tsh); Camel's Foot (E); Monkey Bread (E); Picture-frame Tree (E); Rhodesian Bauhinia (E); Kameelspoor (A); Mokgôrôpô (S); Rhodesiese Bauhinia (A)              | Not mentioned           | Various unidentified STIs and impotence [50, 88].)                                                                                 | 2  |
|  | <i>Philenoptera bussei</i> (Harms) Schrire         | T | Roots; Mphata (S)                                                                                                                                                                 | Boiled and taken orally | Chlamydia [59].                                                                                                                    | 1  |
|  | <i>Philenoptera violacea</i> (Klotzsch) Schrire    | T | Roots; Apple-leaf (E)                                                                                                                                                             | Not mentioned           | Impotence in men [53].                                                                                                             | 1  |
|  | <i>Pterocarpus angolensis</i> DC.                  | T | Stem bark; Mutondo (Tsh)                                                                                                                                                          | Not mentioned           | Various unidentified STIs and "divhu" [50, 53, 68].                                                                                | 3  |
|  | <i>Pterocarpus rotundifolius</i> (Sond.) Druce     | T | Stem bark, Muataha (Tsh)                                                                                                                                                          | Boiled and taken orally | Oral candidiasis associated with HIV-AIDS [57].                                                                                    | 1  |

|  |                                                             |    |                                                                                                                                                       |                                                                                           |                                                                                                          |   |
|--|-------------------------------------------------------------|----|-------------------------------------------------------------------------------------------------------------------------------------------------------|-------------------------------------------------------------------------------------------|----------------------------------------------------------------------------------------------------------|---|
|  | <i>Schotia brachypetala</i> Sond.                           | T  | Roots and stem bark; Mununzu (Tsh); African Greenheart (E); African Walnut (E); Umgxamu (Z); Uvovo (Z); Uvovovo (Z)                                   | Boiled and taken orally                                                                   | Opportunistic infections associated with HIV-AIDS [57].                                                  | 1 |
|  | <i>Senegalia ataxacantha</i> DC.                            | T  | Roots; Muluwa (Tsh); Flame Acacia (E); Flame Thorn (E); Kaffer-wag-'n-bietjie (A); Kafferwortel (A); Mogokare (S), Ubophe (Z); Ugagane (Z), Umnga (X) | Not mentioned                                                                             | Impotence in men [50].                                                                                   | 1 |
|  | <i>Senegalia caffra</i> (Thumb) Wild.                       | T  | Leaves, Morobadiepe (S), Murhovhambado (Tsh); Muvunda-mbado (Tsh); Morobadiepe (S); Umnyamanzi (X); Umthole (X); White thorn (E)                      | Leaves are dried, burned and mixed with animal fat, applied to mouth blisters and ulcers. | Opportunistic infections associated with HIV including mouth ulcers [57].                                | 1 |
|  | <i>Senna auriculata</i> (L.) Roxb.                          | T  | Leaves, Muduwishango (Tsh)                                                                                                                            | Fresh leaves are crushed and drunk orally                                                 | Opportunistic infections associated with HIV-AIDS [57].                                                  | 4 |
|  | <i>Senna didymobotrya</i> (Fresen.) H.S.Irwin & Barneby     | SH | Roots, African senna (E); popcorn senna (E); candelabra tree (E); peanut butter cassia (E)                                                            | Crushed and boiled, taken orally                                                          | Chlamydia, gonorrhoea, syphilis, impotence, and genital warts [51-53, 76].                               | 3 |
|  | <i>Senna italica</i> subsp. <i>arachoides</i> (Burch.) Lock | H  | Roots, Morotelatshotshi, Setlommana, Mankgane (S)                                                                                                     | Boiled and taken orally                                                                   | Various unidentified STIs, impotence, gonorrhoea, "makgoma" and opportunistic infections associated with | 9 |

|  |                                                                        |    |                                                                                                                         |                                                                                          |                                                                                                                                                                |    |
|--|------------------------------------------------------------------------|----|-------------------------------------------------------------------------------------------------------------------------|------------------------------------------------------------------------------------------|----------------------------------------------------------------------------------------------------------------------------------------------------------------|----|
|  |                                                                        |    |                                                                                                                         |                                                                                          | HIV-AIDS vaginal candidiasis [41, 45, 59, 80, 81, 83, 88].                                                                                                     |    |
|  | <i>Senna occidentalis</i> L.                                           | SH | Roots, Modulabadimo (S)                                                                                                 | Not mentioned                                                                            | Impotence in men [53].                                                                                                                                         | 1  |
|  | <i>Senna petersiana</i> (Bolle) Lock                                   | SH | Seeds, Munembenembe (Tsh); Apiespeul (A); Bohlôko (S); Dwarf Cassia (E); Monkey pod (E), Uhwabile (Z); Umnembenembe (Z) | Dried seeds are ground into powder and boiled in water                                   | Impotence, gonorrhoea, and opportunistic infections associated with HIV-AIDS [5, 50, 53, 57, 71, 76, 87].                                                      | 7  |
|  | <i>Sutherlandia frutescens</i> (L.) R.Br.                              | SH | Leaves; Mokgoroma (S)                                                                                                   | Boiled and taken orally                                                                  | Opportunistic infections associated with HIV-AIDS [9]. (                                                                                                       | 1  |
|  | <i>Tephrosia zoutpansbergensis</i> Bremek.                             | SH | Roots, Motswaing (S)                                                                                                    | Not mentioned                                                                            | Impotence in men [53].                                                                                                                                         | 1  |
|  | <i>Vachellia karroo</i> (Hayne) Banfi & Glasso                         | T  | Roots and stem bark, Mooka (S), Muunga (Tsh); Sweet thorn (E); Soetdoring (A); UmuNga (Z)(X)                            | Boiled, used as mouth wash, or applied directly to the genitals to treat vaginal ulcers. | Various unidentified STIs, impotence, opportunistic infections associated with HIV vaginal candidiasis and ulcers [42, 50, 55, 53, 57, 68-70, 87, 88, 90, 95]. | 12 |
|  | <i>Vachellia permixta</i> Burt & Davy                                  | SH | Roots, Moselaphala (S); Doringboom (A); Fyndoring (A); Hairy Acacia (E); Hairy Thorn (E); Mimosa (E)                    | Decoction taken orally                                                                   | Chlamydia [59].                                                                                                                                                | 1  |
|  | <i>Vachellia robusta</i> (Burch.) Kyal. & Boatwr. subs. <i>Robusta</i> | T  | Stem bark and roots; Brack Thorn (E); Brakdoring (A); Enkeldoring (A); Moga (S); Narrow-pod Robust                      | Not mentioned                                                                            | Impotence in men [53].                                                                                                                                         | 1  |

|                      |                                                                           |    |                                                                                                                                                                     |                            |                                                |   |
|----------------------|---------------------------------------------------------------------------|----|---------------------------------------------------------------------------------------------------------------------------------------------------------------------|----------------------------|------------------------------------------------|---|
|                      |                                                                           |    | Thorn (E); River Thorn (E);<br>Umngamanzi (Z);<br>Umngampunzi (X)                                                                                                   |                            |                                                |   |
| <b>Flacourtiace</b>  | <i>Trimeria grandifolia</i><br>(Hochst.) Warb.                            | T  | Leaves, Xidengane (Tsh);<br>Grootblaarysterhout (A);<br>Idlebelendlovu (Z);<br>Mufhanza (Tsh);<br>Muhasha-phande (Tsh),<br>Tshilaphithi (Tsh), Wild<br>Mulberry (E) | Fresh leaves<br>chewed     | Mouth ulcers associated with<br>HIV-AIDS [57]. | 1 |
| <b>Gentianaceae</b>  | <i>Anthocleista grandiflora</i><br>Gilg.                                  | T  | Stem bark; Big Leaf (E);<br>Cabbage Tree (E); Fever<br>Tree (E); Forest Big leaf<br>(E); Grootblaarboom (A);<br>Mueneene (Tsh)                                      | Not mentioned              | Impotence in men [53].                         | 1 |
| <b>Geraniaceae</b>   | <i>Geranium incanum</i><br>Burm.f. var. <i>incanum</i>                    | H  | Whole plant; Bloubos (A);<br>Blouganna (A)                                                                                                                          | Boiled and<br>taken orally | General STIs [90, 91].                         | 2 |
|                      | <i>Monsonia angustifolia</i> E<br>. Mey. ex A. Rich.                      | H  | Roots; Alsbos (A); Crane's<br>Bill (E); Malengoana (S);<br>Malva Naaldbossie (A)                                                                                    | Not mentioned              | Impotence [63].                                | 1 |
| <b>Grassulaceae</b>  | <i>Cotyledon orbiculata</i> L.                                            | SH | Roots, Tsebe ya kolobe (S);<br>Beesbul (A); Pig's ears (E)                                                                                                          | Not mentioned              | Gonorrhoea [45, 80, 96].                       | 3 |
| <b>Gunneraceae</b>   | <i>Gunnera perpensa</i> L.                                                | SH | Roots, Iphuzi (Z);<br>Imfeyesele (Z); Iphuzi<br>lomlambo (X); Qobo (S);<br>River pumpkin (E);<br>Rivierpampoen (A)                                                  | Boiled and<br>taken orally | Gonorrhoea, syphilis [39, 40].                 | 2 |
| <b>Hernandiaceae</b> | <i>Gyrocarpus americanus</i><br>Jacq. subsp. <i>africanus</i><br>Kubitzki | T  | Roots; Helikopterboom<br>(A), Mudzhoudzhou                                                                                                                          | Not mentioned              | Various unidentified STIs [49].                | 1 |

|                    |                                                                                                                             |   |                                                                                                                           |                                                    |                                                                                                                                                  |   |
|--------------------|-----------------------------------------------------------------------------------------------------------------------------|---|---------------------------------------------------------------------------------------------------------------------------|----------------------------------------------------|--------------------------------------------------------------------------------------------------------------------------------------------------|---|
|                    |                                                                                                                             |   | (Tsh); Mutama (Tsh);<br>Propeller Tree (E)                                                                                |                                                    |                                                                                                                                                  |   |
| <b>Hyanthaceae</b> | <i>Bowiea volubilis</i> Harv.                                                                                               | H | Bulbs; Umagaqana (X);<br>climbing onion (E);<br>knoklimop (A); ugibisisila<br>(Z)                                         | Applied on<br>infected areas                       | Syphilis [38-40, 89].                                                                                                                            | 3 |
|                    | <i>Drimia elata</i> Jacq.                                                                                                   | H | Bulbs; Brandui (A);<br>Isiklenama (Z); Jeukbol<br>(A); Jeukui (A); Umqumba<br>(Z); Undongana-<br>zibomvana (Z)            | Boiled and<br>taken orally<br>three times a<br>day | Gonorrhoea [45, 83].                                                                                                                             | 2 |
|                    | <i>Drimia sanguinea</i><br>(Schinz) Jessop<br>Synonym <i>Urginea</i><br><i>sanguinea</i> Schinz                             | H | Bulb, Sekanama (S);<br>Rooislangkop (A)                                                                                   | Boiled and<br>taken orally                         | Various unidentified STIs,<br>chlamydia and opportunistic<br>infections associated with<br>HIV-AIDS [19, 59, 63,75, 80].                         | 5 |
|                    | <i>Eucomis autumnalis</i><br>(Mill.) Chitt.                                                                                 | H | Bulb, Pineapple Lily (E);<br>krulkoppie (A);<br>ubuhlungu becanti (Z);<br>isithithibala esimathunzi<br>(X); umathunga (Z) | Not mentioned                                      | Various unidentified STIs,<br>syphilis and impotence (Van<br>Wyk et al., 2005; Rankoana,<br>2012; Van Wyk et al., 2013;<br>Rasethe et al., 2019) | 4 |
|                    | <i>Eucomis</i><br><i>pallidiflora</i> Baker<br>subsp. <i>pole-</i><br><i>evansii</i> (N.E.Br.)<br>Reyneke ex<br>J.C.Manning | H | Bulb; Mathubadifala;<br>Giant pineapple lily (E).                                                                         | Boiled and<br>taken orally                         | Various unidentified STIs,<br>Chlamydia, gonorrhoea, and<br>impotence [46, 51, 63, 65, 75,<br>80, 81, 83].                                       | 8 |
|                    | <i>Ledebouria ovatifolia</i><br>(Baker) Jessop                                                                              | H | Bulbs; Icubudwana (X);<br>Flat-leaved African<br>hyacinth (E); icubudwana                                                 | Boiled and<br>taken orally                         | General STIs [39].                                                                                                                               | 1 |

|                     |                                                            |   |                                                                                              |                                        |                                                                                                                          |    |
|---------------------|------------------------------------------------------------|---|----------------------------------------------------------------------------------------------|----------------------------------------|--------------------------------------------------------------------------------------------------------------------------|----|
|                     |                                                            |   | (Z); Untanganazibomvu (X)                                                                    |                                        |                                                                                                                          |    |
|                     | <i>Merwillia plumbea</i> (Lindl.) Speta                    | H | Bulbs; Blousalngkop (A); Blue Squill (E); Ichitha (Z); Imbizenkulu (Z), Inguduza (Z)         | Not mentioned                          | Impotence in men [64, 65].                                                                                               | 2  |
| <b>Hydnoraceae</b>  | <i>Hydnora africana</i> Thunb.                             | P | Fruit; Baviaanskos (A); Idolo-lenkonyane (X); Jackal Food (E); Ubuklunga (X); Umavumbuka (Z) | Over ripe fruit eaten                  | Mouth ulcers associated with HIV-AIDS [43].                                                                              | 1  |
| <b>Hypoxidaceae</b> | <i>Hypoxis haemerocallidea</i> Fisch., C.A.Mey.& Avé-Lall. | H | Bulb; Monna wa maledu, Thitikwane (S)                                                        | Boiled and taken orally                | Used for impotence in men, treat gonorrhoea and immune booster for HIV-AIDS patients [9, 42-45, 53, 75, 80, 81, 83, 92]. | 11 |
|                     | <i>Hypoxis latifolia</i> Hook.                             | H | Roots, Ilabathela (X)                                                                        | Steam bath and boiled and taken orally | “Nta shete [39].                                                                                                         | 1  |
|                     | <i>Hypoxis obtusa</i> Burch. ex Ker Gawl.                  | H | Bulb, Monna wa maledu, Thitikwane (S)                                                        | Not mentioned                          | Various unidentified STIs, impotence and opportunistic infections associated with HIV-AIDS [46, 56, 63, 65, 80, 83].     | 6  |
| <b>Icaninaceae</b>  | <i>Pyrenacantha kaurabassana</i> Baill.                    | H | Roots, Inzema (Z)                                                                            |                                        | Genital warts [44].                                                                                                      | 1  |
| <b>Iridaceae</b>    | <i>Gladiolus dalenii</i> Van Geel                          | H | Roots; African Gladiolus (E); Isidwi Esibomvu (Z); Natal Lily (E); Papegaai Gladiolus (A);   | Cooked with milk and drunk             | Impotence [62, 64].                                                                                                      | 2  |

|                  |                                                             |    |                                                                                                                                                                             |                                        |                                                                                           |   |
|------------------|-------------------------------------------------------------|----|-----------------------------------------------------------------------------------------------------------------------------------------------------------------------------|----------------------------------------|-------------------------------------------------------------------------------------------|---|
|                  |                                                             |    | Udwendweni (Z);<br>Uhlakahle (Z);<br>Wildeswaardlelie (A)                                                                                                                   |                                        |                                                                                           |   |
| <b>Juncaceae</b> | <i>Juncus kraussii</i> Hochst                               | H  | Roots; Incema (Z); Matting<br>Rush (E); Rushes (E)                                                                                                                          | Not mentioned                          | Various unidentified STIs in<br>women [62, 64].                                           | 2 |
|                  | <i>Juncus lomatoophyllus</i><br>Spreng                      | H  | Roots; Juncus (E)                                                                                                                                                           | Not mentioned                          | Various unidentified STIs in<br>women [62, 64].                                           | 2 |
| <b>Lauraceae</b> | <i>Cinnamomum verum</i><br>J.Presl                          | T  | Roots; Siina (S)                                                                                                                                                            | Boiled and<br>taken orally             | Mouth ulcers and skin fungal<br>infections associated with<br>HIV-Aids [79, 82, 83].      | 3 |
|                  | <i>Cinnamomum</i><br><i>salicifolium</i> (Nees)<br>Kosterm. | H  | Bulb; Siina (S)                                                                                                                                                             | Boiled and<br>taken orally             | Opportunistic infections<br>associated with HIV-AIDS [82,<br>83].                         | 2 |
|                  | <i>Cryptocarya myrtifolia</i><br>Stapf.                     | SH | Stem bark; Camphor<br>Tree (E); Igqebe (Z);<br>Isithungwa (X);<br>Kansferboom (A);<br>Umgqebe (X);<br>Umkhondweni (Z);<br>Umnecatyana (X);<br>Umnqgqabe (Z); Umqqebe<br>(X) | Not mentioned                          | “Isiphatsholo”, STI associated<br>with females [62, 64].                                  | 2 |
| <b>Liliaceae</b> | <i>Albuca nelsonii</i> N.E Br                               | SH | Bulbs; Inqwebeba (Z/X)                                                                                                                                                      | Decoction taken<br>orally              | Gonorrhoea [39, 40].                                                                      | 2 |
| <b>Lamiaceae</b> | <i>Clerodendrum glabrum</i><br>E.Mey.                       | SH | Stem bark; Mohlokohloko<br>(S); Munkhathingwe (Tsh)                                                                                                                         | Dried, boiled in<br>water and<br>drunk | Oral ulcers associated with<br>HIV-AIDS and various<br>hepatitis infections [50, 57, 91]. | 3 |
|                  | <i>Leonotis leonurus</i> (L.)<br>R.Br.                      | SH | Whole plant; Bulderdagga<br>(A); Cape Hemp (E);<br>Dagga (A);                                                                                                               | Not mentioned                          | Unidentified STIs and<br>Hepatitis B<br>[90].                                             | 1 |



|                    |                                                   |   |                                                                                                                                          |                                                      |                                                                               |   |
|--------------------|---------------------------------------------------|---|------------------------------------------------------------------------------------------------------------------------------------------|------------------------------------------------------|-------------------------------------------------------------------------------|---|
|                    |                                                   |   | munyamunyane (Z);<br>Imvovo (X); Lebake (S),<br>Leonotis (E); Lion's Ear<br>(E); Umfinafincane (X);<br>Utshwala-bezinyoni<br>Omncane (Z) |                                                      |                                                                               |   |
|                    | <i>Mentha longifolia</i> (L.)<br>L.               | H | Roots; Balderja (A);<br>Horsemint (E); Kerena (S);<br>Kruie (A); Pennyroyal (E);<br>Rivier Kruie (A)                                     | Not mentioned                                        | Gonorrhoea, shingles<br>associated with HIV-AIDS [9,<br>60, 92].              | 3 |
|                    | <i>Plectranthus ciliatus</i><br>E.Mey.            | H | Roots; Gespikkelde<br>Muishondblaar (A);<br>Lephele-phele (S);<br>Speckled Spur-flower (E);<br>Umsuthuza (Z)                             | Not mentioned                                        | Opportunistic infections<br>associated with HIV-AIDS [80,<br>83].             | 2 |
| <b>Loganiaceae</b> | <i>Anthocleista grandifolia</i><br>Gilg           | T | Stem bark and leaves;<br>tobacco tree (E);<br>Wildetabakboom (A);<br>Mueneene (Tsh); Geludzu<br>(X); Mophala (S)                         | Not mentioned                                        | Unidentified STIs [95].                                                       | 1 |
|                    | <i>Strychnos decussata</i><br>(Pappe) Gilg        | T | Stem bark; Cape Teak (E);<br>Kaapsekiaathout (A);<br>Mukangala (V);<br>Umhlamahlahla (X);<br>Umlahlankosi (Z)                            | Not mentioned                                        | Various unidentified STIs [49].                                               | 1 |
|                    | <i>Strychnos</i><br><i>madagascariensis</i> Poir. | T | Roots and stem bark,<br>Morutla (S), Mukwakwa<br>(Tsh)                                                                                   | Ground onto<br>powder and<br>boiled, taken<br>orally | Various unidentified I STIs,<br>mouth ulcers associated with<br>[19, 41, 57]. | 3 |

|                     |                                                  |    |                                                                                 |                                          |                                                                                            |   |
|---------------------|--------------------------------------------------|----|---------------------------------------------------------------------------------|------------------------------------------|--------------------------------------------------------------------------------------------|---|
|                     | <i>Strychnos potatorum</i> L.f.                  | T  | Stem bark, Mukongovhoti (Tsh)                                                   | Soaked in cold water, used as mouth wash | Mouth ulcers associated with HIV-AIDS [57].                                                | 1 |
|                     | <i>Strychnos spinosa</i> Lam.                    | T  | Roots, Morapa, Mokwakwa (S)                                                     | Decoction taken orally                   | Various unidentified STIs [41].                                                            | 1 |
| <b>Loranthaceae</b> | <i>Erianthemum dregei</i> (Eckl. & Zeyh.) Tiegh. | SH | Root, Isidumbu (Z); Amaphakama (Z); Inevu emhlophe (Z); Inomfi (Z); Voëlent (A) | Not mentioned                            | Various unidentified STIs and internal sores [44].                                         | 1 |
| <b>Malvaceae</b>    | <i>Adansonia digitata</i> L.                     | T  | Stem bark, Motsoo (S)                                                           | Not mentioned                            | Mouth ulcers and skin fungal infections associated with HIV-Aids [19].                     | 1 |
|                     | <i>Grewia occidentalis</i> L.                    | SH | Roots, Mopharatshwene (S)                                                       | Not mentioned                            | General STIs [68].                                                                         | 1 |
|                     | <i>Grewia flava</i> DC.                          | H  | Roots, Mothetlwa (S)                                                            | Decoction taken orally                   | Various unidentified STIs, chlamydia and diarrhoea arising from HIV-AIDS [19, 41, 59, 65]. | 4 |
|                     | <i>Grewia microthyrsa</i> K.Schum. ex Burret     | SH | Roots, Mupfuka (Tsh)                                                            | Not mentioned                            | Impotence in men [50].                                                                     | 1 |
|                     | <i>Grewia villosa</i> Willd. var. <i>villosa</i> | SH | Roots; Mallow Raisin (E); Mupuna (Tsh); Murapfa (TSH); Tshirabva (Tsh)          | Not mentioned                            | Vaginal discharge [76].                                                                    | 1 |
|                     | <i>Hibiscus vitifolius</i> L.                    | SH | Roots, Muhwidzi (Tsh)                                                           | Not mentioned                            | Vaginal discharge [50].                                                                    | 1 |
|                     | <i>Hibiscus nigracaulis</i> Baker f.             | H  | Roots; Mendonca (E)                                                             | Chewed                                   | Impotence in men [53].                                                                     | 1 |
|                     | <i>Waltheria indica</i> L.                       | H  | Roots, Mokhutesela, Motayabannyana (S);                                         | Boiled and taken orally                  | Various unidentified STIs [19, 41].                                                        | 2 |

|                     |                                             |   |                                                                                                                                                                                    |                            |                                                                   |   |
|---------------------|---------------------------------------------|---|------------------------------------------------------------------------------------------------------------------------------------------------------------------------------------|----------------------------|-------------------------------------------------------------------|---|
|                     |                                             |   | Meidebossie (A);<br>Delelemukula (Tsh)                                                                                                                                             |                            |                                                                   |   |
| <b>Meliaceae</b>    | <i>Ekeberkia capensis</i><br>Sparm.         | T | Whole plant, Mmaba (S);<br>Mmidibidi (S); Mountain<br>ash (E), Mudouma (Tsh);<br>Plum (E); Rooi-essenhout<br>(A); Umathunzini-we-<br>zintaba (Z); Umnyamathi<br>(Z); Umnyamati (X) | Not mentioned              | Various unidentified STIs [68,<br>75].)                           | 2 |
|                     | <i>Melia azeadarach</i> L.                  | T | Leaves; Mosara (S),<br>Muserenga (Tsh)                                                                                                                                             | Not mentioned              | Gonorrhoea and shingles<br>arising from HIV-AIDS [19, 60,<br>65]. | 3 |
|                     | <i>Trichilia dregeana</i><br>Sond.          | T | Leaves, Umkhuhlu (Z);<br>Cape Mahogany (E);<br>Forest Mahogany (E);<br>Mmaba (S); Mutshikili<br>(Tsh); Mutuhu (Tsh),<br>Umkhuhlu (Z);<br>Umathunzi (Z);<br>Umhlakele (X)           | Boiled and<br>taken orally | Syphilis [44].                                                    | 1 |
|                     | <i>Trichilia emetica</i> Vahl.              | T | Stem bark; Umkhuhlu (Z);<br>Cape Mahogany (E);<br>Forest Mahogany (E);<br>Mmaba (S);                                                                                               | Decoction<br>drunk         | Impotence in men [53].                                            | 1 |
| <b>Melanthaceae</b> | <i>Bersama lucens</i><br>(Hochst.) Szyszyl. | T | Stem bark, Sindiyandiya<br>(Z); Isindlandla (Z);<br>Glossy bersama (E);<br>Undlandla (X);<br>Isindiyandiya (X);                                                                    | Decoction taken<br>orally  | “Nta shete” and impotence<br>[39, 40, 90, 91].                    | 4 |

|                            |                                                     |    |                                                                                                                                             |                                                                          |                                                                                                                                   |   |
|----------------------------|-----------------------------------------------------|----|---------------------------------------------------------------------------------------------------------------------------------------------|--------------------------------------------------------------------------|-----------------------------------------------------------------------------------------------------------------------------------|---|
|                            |                                                     |    | Blinkblaarwitessenhout (A); Glossy white ash (E);                                                                                           |                                                                          |                                                                                                                                   |   |
| <b>Menispermaceae</b>      | <i>Cissampelos capensis</i> L.f.                    | SH | Roots; Davidjies (A); Davidjieswortel (A); Dawidjies (A); Dawidjieswortel (A); Fynblaarklimop (A)                                           | Not mentioned                                                            | Syphilis [90, 93].                                                                                                                | 2 |
|                            | <i>Cissampelos torulosa</i> E.Mey. ex Harv. & Sond. | T  | Stem bark; Lukandululo (Tsh); Davidjies (A); Davidjieswortel (A); Ukhalimele (Z); Ukhalimele-omkhulu (Z), Umthombo (Z)                      | Ground onto powder and boiled, taken orally or gargled                   | Mouth ulcers associated with HIV-AIDS [57].                                                                                       | 1 |
|                            | <i>Tinospora fragosa</i> Verdoorn & Troupin         | H  | Leaves and stem; Marvel Creeper (E); Moses' Staff (E); Moses-se-kierie (A); Wonderplant (A); Wonderstok (A)                                 | Boiled and taken orally                                                  | Various unidentified STIs [41].                                                                                                   | 1 |
| <b>Mesembryanthemaceae</b> | <i>Carpobrotus edulis</i> (L.) N.E.Br.              | H  | Leaves, Tima mollo (S); Lutele (Tsh); Hottentot's Fig (E); Hottentotsvy (A); Ikhambilamabulawo (Z)                                          | Dried, ground and immersed in water, used as mouth wash, or taken orally | Treat "tshofela", Herpes virus, mouth ulcers, shingles, and vaginal thrush associated with HIV-AIDS [19, 56, 57, 90, 91, 93, 96]. | 7 |
| <b>Moraceae</b>            | <i>Ficus abutilifolia</i> (Miq.) Miq.               | T  | Roots and stem bark, Mphaya (S); Mofa (S); Monokane (S); Tshikululu (Tsh); Ubambematsheni (Z); Large-leaved Rock Fig (E), Rock Wild Fig (E) | Boiled and taken orally                                                  | Various unidentified STIs [41].                                                                                                   | 1 |

|                       |                                            |    |                                                                                                                                          |                                               |                                                                                       |   |
|-----------------------|--------------------------------------------|----|------------------------------------------------------------------------------------------------------------------------------------------|-----------------------------------------------|---------------------------------------------------------------------------------------|---|
|                       |                                            |    |                                                                                                                                          |                                               |                                                                                       |   |
|                       | <i>Ficus capensis</i> Thunb.               | T  | Fruits; Muhuyu-ngala (TSH); Broom cluster fig (E)                                                                                        | Not mentioned                                 | Various unidentified STIs [49].                                                       | 1 |
|                       | <i>Ficus carica</i> L.                     | T  | Fruits, Muhuyu (Tsh); Common fig (E)                                                                                                     | Latex mixed with water and used as mouth wash | Mouth ulcers associated with HIV-AIDS [57].                                           | 1 |
|                       | <i>Ficus sycomorous</i> L.                 | T  | Fruits; Muhuyu-lukuse (TSH); Sycomore fig (E)                                                                                            | Not mentioned                                 | Various unidentified STIs (Fernandes et al., 2008)                                    | 1 |
|                       | <i>Morus alba</i> L. var. <i>alba</i>      | T  | Whole plant; Moerbe (A); White Mulberry (E); Wit Moerbe (A)                                                                              | Boiled and taken orally                       | Treats “divhu” [53].                                                                  | 1 |
| <b>Musaceae</b>       | <i>Ensete ventricosum</i> (Welw.) Cheesman | T  | Roots, Banana (S); Banana palm (E); Wild Banana (E); Banana Tree (E); Motolô (S); Mulolo (Tsh), Piesangpalm (A)                          | Bioled and taken orally                       | Various unidentified STIs [41].                                                       | 1 |
|                       | <i>Musa acuminata</i> Colla                | SH | Roots, Ubhanana (Z); Mobhanana (S)                                                                                                       | Boiled and taken orally                       | Various unidentified STIs and internal sores [44].                                    | 1 |
| <b>Myrothamnaceae</b> | <i>Myrothamnus flabellifolia</i> Welw.     | SH | Whole plant, Boka (S); Fey (S); Ergboegoe (A); Bergbuchu (A); Resurrection plant (E); Umavavuke (ND); Uvukakwabafile (Z); Uvukwababa (Z) | Pounded and taken orally                      | Opportunistic infections associated with HIV-AIDS and Impotence [46, 65, 80, 81, 83]. | 5 |
| <b>Myrtaceae</b>      | <i>Psidium guajava</i> L.                  | T  | Leaves, Mo-guava (S); common guava (E); yellow                                                                                           | Not mentioned                                 | Various unidentified STIs, gonorrhoea [38, 50, 51, 89].                               | 4 |

|                    |                                            |    |                                                                                                                                              |                         |                                                                                                                                         |    |
|--------------------|--------------------------------------------|----|----------------------------------------------------------------------------------------------------------------------------------------------|-------------------------|-----------------------------------------------------------------------------------------------------------------------------------------|----|
|                    |                                            |    | guava (E), lemon guava (E)                                                                                                                   |                         |                                                                                                                                         |    |
|                    | <i>Syzygium cordatum</i> Hochst. ex Krauss | T  | Leaves and stem bark, Umdoni (Z); Motlho (S); Motu (S); Mutu (Tsh); Umdoni (Z); Umjomi (X); Water berry (E); Water Wood (E); Waterbessie (A) | Boiled and taken orally | Gonorrhoea [38, 44, 89].                                                                                                                | 3  |
| <b>Myrsinaceae</b> | <i>Rapanea melanophloeos</i> (L.) Mez      | T  | Stem bark; Swartbas (A); Swartbasboom (A); Tshididiri (Tsh); Tshikonwa (Tsh), Umaphipha (Z); Umaphiphakhubalo (Z), Uvukakwabafilikhubalo (Z) | Not mentioned           | Various unidentified STIs [49].                                                                                                         | 1  |
| <b>Ochnaceae</b>   | <i>Brackenridgea zanguebarica</i> Oliv.    | SH | Roots; Geellekkerbreek (A); Mutavhatsindi (Tsh)                                                                                              | Not mentioned           | Various unidentified STIs [49]. (Fernandes et al., 2008)                                                                                | 1  |
| <b>Olacaceae</b>   | <i>Ximenia americana</i> L.                | SH | Roots; Motshidi-mphiswane (S); Blue Sour Plum (E); Doringpruim (A); Suurpruim (A)                                                            | Not mentioned           | Various unidentified STIs, mouth ulcers associated with HIV-AIDS and impotence [19, 82].                                                | 2  |
|                    | <i>Ximenia caffra</i> Sond.                | T  | Roots, Motshidi-kgomo (S); Motshidi (S); Morotologa kgomo (S); Umgwenya (Z), Umthunduluka (Z), Sourplum (E); Wildesuurpruima (A)             | Boiled and taken orally | Various unidentified STIs and opportunistic infections associated with HIV-AIDS and gonorrhoea [19, 41, 44, 49, 50, 65, 68-70, 76, 86]. | 11 |

|                       |                                                           |    |                                                                                                                                    |                                          |                                                                            |   |
|-----------------------|-----------------------------------------------------------|----|------------------------------------------------------------------------------------------------------------------------------------|------------------------------------------|----------------------------------------------------------------------------|---|
| <b>Oleaceae</b>       | <i>Jasminum fluminense</i> Vell. subsp. <i>Fluminense</i> | SH | Roots; Lowveld Wild Jasmine (E); Maloyana (Z)                                                                                      | Boiled and taken orally                  | Various unidentified STIs [88].                                            | 1 |
| <b>Orchidaceae</b>    | <i>Anselia africana</i> Lindl.                            | H  | Stem; Imfeyenkawu (Z); Leopard Orchid (E); Luiperdorgidee (A); Tiger Orchid (E); Tree Orchid (E)                                   | chewed                                   | Impotence in men [53].                                                     | 1 |
| <b>Papaveraceae</b>   | <i>Argemone ochroleuca</i> Sweet.                         | H  | Whole plant; Zavhazavha (Tsh); Bloudissel (A); Burweed (E); Geelpoppie (A); Mexican Poppy (E); Yellow Poppy (E)                    | Not mentioned                            | Gonorrhoea [60].                                                           | 1 |
| <b>Passifloraceae</b> | <i>Adenia gummifera</i> (Harv.) Harms                     | C  | Roots; Phindaumshaye (Z); Impinda (Z); Impindamshaye (Z); Monkey Rope (E); Slangklimop (A); Snake-climber (E); Wild Grenadilla (E) | Boiled and taken orally                  | Opportunistic infections associated with HIV-AIDS and gonorrhoea [44, 53]. | 2 |
| <b>Pedaliaceae</b>    | <i>Dicerocarum eriocarpum</i> (Decne) Abels               | H  | Whole plant; Boot protectors (E); Devil thorn (E); Inkunzane (Z); Intekelane (Z) Stud thorn (E)                                    | Boiled and the entire 1L IS taken orally | Syphilis [92].                                                             | 1 |
|                       | <i>Harpagophytum procumbens</i> (Burch.) DC. ex Meisn.    | H  | Fleshy roots; Lemata (S); Sengaparile (S); Devil's claw (E)                                                                        | Boiled and taken orally                  | Chlamydia [59, 66].                                                        | 2 |
| <b>Phyllanthaceae</b> | <i>Antidesma venosum</i> E. Mey. ex Tul.                  | SH | Roots; Isibhangamlotha (Z); Isiqutwane (Z);                                                                                        | Boiled and drunk orally                  | Impotence in men [53].                                                     | 1 |

|                        |                                                                                                      |    |                                                                                                                                                                        |                             |                                                       |   |
|------------------------|------------------------------------------------------------------------------------------------------|----|------------------------------------------------------------------------------------------------------------------------------------------------------------------------|-----------------------------|-------------------------------------------------------|---|
|                        |                                                                                                      |    | Kgôbê-tsabadishana (S);<br>Modulane (S); Mufhala-<br>khwali (Tsh); Tassel-berry<br>(E); Tosselbessie (A);<br>Umhlabahlungulu (Z);<br>Umhlalanyoni (Z);<br>Umtyongi (X) |                             |                                                       |   |
|                        | <i>Bridelia cathartica</i><br>Bertol.                                                                | SH | Leaves and roots,<br>Umkwawulangazi (Z);<br>Blou-soetbessie (A); Blue<br>Sweetberry (E)                                                                                | Boiled and<br>taken orally  | Various unidentified STIs and<br>internal sores [44]. | 1 |
|                        | <i>Bridelia micrantha</i><br>(Hochst.) Baill.                                                        | SH | Stem bark;<br>Isihlalamangcwibi (Z);<br>Mitserie (A); Mitzeeri (E);<br>Motsêrê (S); Munzere<br>(Tsh); Mzeriehout (A);<br>Umhlahlungulu (X)                             | Boiled and<br>taken orally  | Various unidentified STIs and<br>internal sores [50]. | 1 |
|                        | <i>Bridelia mollis</i> Hutch.                                                                        | SH | Stem bark; Mokamanawa<br>(S); Mokokonala (S);<br>Mukumba-kumbane (Tsh);<br>Velvet Bridelia (E); Velvet<br>Sweet-berry (E)                                              | Not mentioned               | Various unidentified STIs [84].                       | 1 |
|                        | <i>Pseudolachnostylis</i><br><i>maprouneifolia</i> Pax var.<br><i>dekindtii</i> (Pax) Radcl.-<br>Sm. | T  | Stem bark; Hairy Kudu-<br>berry (E); Harige<br>Koedoebessie (A)                                                                                                        | Not mentioned               | Various unidentified STIs [50,<br>76].                | 2 |
| <b>Picrodendraceae</b> | <i>Androstachys</i><br><i>johnsonnii</i> Prain.                                                      | T  | Roots; Lebombo ironwood<br>(E)                                                                                                                                         | Boiled and<br>taken orally  | Impotence in men [53].                                | 1 |
| <b>Piperaceae</b>      | <i>Piper capense</i> L.f.                                                                            | SH | Stem bark, Mulilwe (Tsh);<br>Ihlolane (Z);                                                                                                                             | Dried bark is<br>ground and | Various unidentified STIs,<br>vaginal discharge and   | 3 |



|                       |                                                   |    |                                                                                                                                                         |                                                                                                                    |                                                                                                                                                 |    |
|-----------------------|---------------------------------------------------|----|---------------------------------------------------------------------------------------------------------------------------------------------------------|--------------------------------------------------------------------------------------------------------------------|-------------------------------------------------------------------------------------------------------------------------------------------------|----|
|                       |                                                   |    | Uluphokwane (Z),<br>Uluphokwana (Z);<br>Sterkpeper (A); Stertpeper<br>(A); Wild Pepper (E),                                                             | boiled, taken<br>orally                                                                                            | opportunistic infections<br>associated with HIV-AIDS [49,<br>50, 57].                                                                           |    |
| <b>Pittosporaceae</b> | <i>Pittosporum<br/>viridiflorum</i> Sims          | T  | Roots and stem bark;<br>White Cape Beech (E);<br>Witboekenhout (A);<br>Umphushane (Z);<br>Kgalagangwe (S);<br>Mutanzwakhamelo (Tsh);<br>Umgqwengqwe (X) | Powdered plant<br>material is taken<br>with beer.                                                                  | Impotence in men [95].                                                                                                                          | 1  |
| <b>Polygalaceae</b>   | <i>Persicaria decipiens</i><br>(R.Br.) K.L.Wilson | H  | Whole plant, Mohwehwe<br>(S)                                                                                                                            | Not mentioned                                                                                                      | Gonorrhoea [93].                                                                                                                                | 1  |
|                       | <i>Polygala fruticosa</i><br>P.J.Bergius          | H  | Whole plant;<br>Featherdusters (E); Heart-<br>leaved Polygala (E);<br>Ithethe (Z); Shrubby<br>Polygala (E)                                              | Not mentioned                                                                                                      | Gonorrhoea [38, 90, 91].                                                                                                                        | 3  |
|                       | <i>Securidaca<br/>longipedunculata</i><br>Fresen. | SH | Roots, Mphesu (S);<br>Mmaba (S); Mupesu (Tsh)                                                                                                           | Powdered and<br>take with<br>mageu orally for<br>aphrodisiac use<br>and decoction<br>taken orally for<br>chlamydia | Used to treat impotence in<br>men treats chlamydia,<br>gonorrhoea and various<br>unidentified STIs [19, 46, 49,<br>50, 56, 59, 63, 76, 81, 91]. | 10 |
| <b>Portulacaceae</b>  | <i>Portulaca quadrifolia</i> L.                   | H  | Whole plant;<br>Amalenjane(Z); Ushisizwe<br>(Z); Usompungane                                                                                            | Not mentioned                                                                                                      | Pubic lice [61].                                                                                                                                | 1  |

|                      |                                             |    |                                                                                                                                                                                                  |                                                                                      |                                                                                                    |   |
|----------------------|---------------------------------------------|----|--------------------------------------------------------------------------------------------------------------------------------------------------------------------------------------------------|--------------------------------------------------------------------------------------|----------------------------------------------------------------------------------------------------|---|
| <b>Proteaceae</b>    | <i>Faurea saligna</i> Harv.                 | T  | Stem bark, Mohlakô (S); Mongêna (S); Mutango (Tsh); Rooi-boekenhout (A); Swartboekenhout (A); Transvaal Beech (E); Transvaal Beechwood (E); Isefu (Z); Isisefo (Z)                               | Dried, powdered and soaked in warm water and then used as douched for vaginal ulcers | Vaginal ulcers [57, 86].                                                                           | 2 |
|                      | <i>Protea caffra</i> Meisn.                 | T  | Seeds, Gewone suikerbos (A); Highveld Protea (E), Natal Sugarbush (E); Indlunge (X); Isiqwane (X); Isadlunge (X); Isiqalaba (Z); Mogalagala (S); Segwapi (S); Tshididiri (Tsh); Uhlinkihane (Z); | Not mentioned                                                                        | Chlamydia [80, 83].                                                                                | 2 |
| <b>Punicaceae</b>    | <i>Punica granatum</i> L.                   | SH | Roots, Mokgarenate (S)                                                                                                                                                                           | Boiled and taken orally                                                              | Diarrhoea and oral thrush associated with HIV-AIDS [19, 43].                                       | 2 |
| <b>Ranunculaceae</b> | <i>Ranunculus multifidus</i> Forssk.        | H  | Whole plant, Uxaphozi (Z); Ishashakazane (Z); Isijojokazana (Z); Botterblom (A); Kankerblare (A); Buttercup flower (E)                                                                           | Decoction used as enema                                                              | Genital warts and gonorrhoea [44, 72].                                                             | 2 |
| <b>Rhamnaceae</b>    | <i>Helinus intergrifolius</i> (Lam.) Kuntze | T  | Roots, Morakane (S)                                                                                                                                                                              | Boiled and taken orally                                                              | Various unidentified STIs [41].                                                                    | 1 |
|                      | <i>Ziziphus mucronata</i> Willd.            | T  | Roots, Mokgalo (S); Mukhalu (Tsh); Mutshetshete (Tsh); Skynblaar-wag-'n-bietjie                                                                                                                  | Boiled and taken orally                                                              | Various unidentified STIs, impotence, gonorrhoea, diarrhoea, and fungal infections associated with | 8 |

|                  |                                                  |    |                                                                                                                                                   |                                        |                                                                                          |   |
|------------------|--------------------------------------------------|----|---------------------------------------------------------------------------------------------------------------------------------------------------|----------------------------------------|------------------------------------------------------------------------------------------|---|
|                  |                                                  |    | (A); Umhlahlankosi (Z); Umlahlankosi (Z); Umpafa (ND)                                                                                             |                                        | HIV-AIDS [19, 41, 45, 53, 65, 75, 80, 83].                                               |   |
|                  | <i>Berchemia discolor</i> (Klotzsch) Hemsl.      | T  | Stem bark and leaves; Motsintila (S); Mountain Date (E); Muhukhuma (Tsh); Munie (Tsh); Nmumu (Z); Wild Almond (E); Wild Date (E); Wilde-dadel (A) | Not mentioned                          | Vaginal discharge [76].                                                                  | 1 |
| <b>Rosaceae</b>  | <i>Parinari curatellifolia</i> Planch. ex Benth. | T  | Stem bark, Muvhula (TSH); Mobola Plum (E); Muchakata (ND); Muvhula (Tsh); Sand Apple (E); Ubulawu (Z); Umnkuna (ND)                               | Not mentioned                          | Various unidentified STIs [50].                                                          | 1 |
|                  | <i>Prunus africana</i> (Hook.f.) Klakman         | T  | Roots, Inkokhokho (Z); Inyazangoma (X); Inyazangomelimnyama (Z); Itywina-elikhul (X); Mogohloro (S); Mulalamanga (Tsh)                            | Not mentioned                          | Various unidentified STIs and opportunistic infections associated with HIV-AIDS [9, 75]. | 2 |
|                  | <i>Prunus persica</i> (L.) Batsch                | T  | Roots; Moperekisi (S); Pygeum (E)                                                                                                                 | Powdered and taken with mageu/porridge | Impotence in men [46, 53, 65, 78, 81, 71].                                               | 6 |
| <b>Rubiaceae</b> | <i>Cepalanthus natalensis</i> Oliv.              | SH | Roots; Far Tree (E); Murondo (Tsh); Quinine Berry (E); Strawberry-bush (E); Witpruim (A)                                                          | Decoction taken orally                 | Impotence in men [53].                                                                   | 1 |

|  |                                               |    |                                                                                                                                                  |                                                                                               |                                                                                                                          |   |
|--|-----------------------------------------------|----|--------------------------------------------------------------------------------------------------------------------------------------------------|-----------------------------------------------------------------------------------------------|--------------------------------------------------------------------------------------------------------------------------|---|
|  | <i>Lagyniasis dryadum</i><br>(S.Moore) Robyns | SH | Roots; Mmilo o monnyane (S)                                                                                                                      | Decoction taken orally                                                                        | Impotence in men [53].                                                                                                   | 1 |
|  | <i>Coddia rudis</i> (E.Mey. ex Harv.)         | SH | Whole plant;<br>Kleinbeenappel (A);<br>Lesser Xeromphis (E);<br>Mukwakwa (Tsh); Small Bone-apple (E);<br>Tshinapanapana (Tsh);<br>Umdondwani (Z) | Not mentioned                                                                                 | Impotence in men [64].                                                                                                   | 1 |
|  | <i>Richardia brasiliensis</i><br>Gomes        | H  | Whole plant; Mulegere (Tsh); Molekere (S)                                                                                                        | Dried, burnt and mixed with animal fat, applied directly to infected mouth and vaginal ulcers | Mouth and vaginal ulcers [57].                                                                                           | 1 |
|  | <i>Toddalia asiatica</i> L.                   | C  | Roots and leaves;<br>Climbing Orange (E);<br>Cockspur Orange (E);<br>Rank-lemoentjie (A)                                                         | Decoction drunk                                                                               | Unidentified STIs [53].                                                                                                  | 1 |
|  | <i>Vangueria infausta</i><br>Burch.           | T  | Roots and stem bark;<br>Mmilo (S); Ntswila (S);<br>Mizwilu (Tsh); Muzwilu (Tsh); Grootmispel (A);<br>Velvet Wild-medlar (E);<br>Wildemispel (A)  | Chopped in small pieces and boiled, taken orally                                              | Stem bark is used to treat diarrhoea associated with HIV-AIDS, Roots are used for impotence in men [42, 50, 57, 62, 64]. | 5 |
|  | <i>Vangueria pygmaea</i><br>Schltr.           | T  | Stem bark and leaves;<br>Dwarf Crowned-medlar (E); Goubos (A); Gousiekte                                                                         | Not mentioned                                                                                 | Unidentified STIs [85].                                                                                                  | 1 |

|                    |                                                                 |    |                                                                                                                                    |                                                         |                                                                                                                                               |   |
|--------------------|-----------------------------------------------------------------|----|------------------------------------------------------------------------------------------------------------------------------------|---------------------------------------------------------|-----------------------------------------------------------------------------------------------------------------------------------------------|---|
|                    |                                                                 |    | Bush (E); Grysappel (A);<br>Hairy Gousiektebossie (E);<br>Umkukuzela (Z)                                                           |                                                         |                                                                                                                                               |   |
| <b>Rutaceae</b>    | <i>Agathosma apiculata</i><br>E.Mey. ex Bartl. &<br>H.L. Wendl. | SH | Leaves; Knoffel Buchu (E);<br>Knoffelboegoe (A)                                                                                    | Boiled and<br>taken orally                              | Shingles, mouth, and genital<br>ulcers associated with HIV-<br>AIDS [9].                                                                      | 1 |
|                    | <i>Citrus limon</i> (L.)<br>Osbeck                              | SH | Roots; Tshikavhavhe (Tsh)                                                                                                          | Boiled and<br>taken orally                              | General STIs [50].                                                                                                                            | 1 |
|                    | <i>Zanthoylum capense</i><br>(Thunb.) Harv.                     | T  | Roots and leaves,<br>Senokomaropa (S),<br>Umlungumabele (X)                                                                        | Infusions taken<br>orally                               | Syphilis and opportunistic<br>infections associated with<br>HIV-AIDS [40-42, 65, 80, 83].                                                     | 6 |
|                    | <i>Zanthoylum davyi</i><br>(I.Verd.)<br>P.G.Waterman            | T  | Roots; Munungu (Tsh);<br>Senokomaropa (S);<br>Tshamavhudzi (Tsh);<br>Umlungamabele (X);<br>Umlungumabele (X);<br>Umnungumabele (Z) | Not mentioned                                           | Unidentified STIs and<br>impotence [49, 50].                                                                                                  | 2 |
|                    | <i>Zanthoylum humile</i><br>(E.A.Bruce)<br>P.G.Waterman         | SH | Roots; Monokonokwane<br>(S); Hairy knobwood (E);<br>Harige perdepram (A)                                                           | Powdered and<br>taken with<br>mageu or soft<br>porridge | Opportunistic infections<br>associated with HIV-AIDS and<br>impotence [46, 80-83].                                                            | 4 |
| <b>Salicaceae</b>  | <i>Oncoba spinosa</i> Forssk<br>subsp. <i>Spinosa</i>           | SH | Roots; Snuff-box Tree (E);<br>Tonga (A)                                                                                            | Decoction taken<br>orally                               | Impotence in men [53].                                                                                                                        | 1 |
| <b>Santalaceae</b> | <i>Osyris lanceolata</i><br>Hochst. & Steud.                    | SH | Roots, Mphere (S);<br>Serogabaloi; Mpeta (Tsh);<br>ladbas (A), Ingondotha-<br>mpete (Z), Intekaza (X)                              | Boiled and<br>taken orally                              | Various unidentified STIs,<br>opportunistic infections<br>associated with HIV-AIDS<br>(oral thrush) and impotence<br>[46, 50, 57, 59, 68-70]. | 6 |

|                    |                                                                    |    |                                                                                                                                                                      |                                                        |                                                                                                                                      |   |
|--------------------|--------------------------------------------------------------------|----|----------------------------------------------------------------------------------------------------------------------------------------------------------------------|--------------------------------------------------------|--------------------------------------------------------------------------------------------------------------------------------------|---|
|                    | <i>Pappea capensis</i> Eckl. & Zeyh.                               | T  | Leaves; Murodolo (Tsh); Mongatane (S); Morobadiepe (S) Umvuma (Z), Uvumbomvu (Z), Uzagogwane (Z), Wild Cherry (E), Wild Plum (E), Wilde-amandel (A), Xikwakwaxu (TS) | Ground and immersed in water                           | Various unidentified STIs, Vaginal ulcers associated with HIV-AIDS, chlamydia and as an aphrodisiac for men [50, 53, 57, 59, 68-70]. | 7 |
|                    | <i>Viscum capense</i> L.f.                                         | SH | Stems; Voëlent (A); Vogelstront (A)                                                                                                                                  | Decoction drunk as tea                                 | Mouth ulcers associated with HIV-AIDS [43].                                                                                          | 1 |
| <b>Sapindaceae</b> | <i>Dodonaea viscosa</i> Jacq var. <i>angustifolia</i> (L.f) Benth. | T  | Roots; Mofentshe (S); Muthathavhanna (Tsh); mutata-vhana (Tsh); Sand olive (E); Sandolien, ysterbos (A)                                                              | Fresh leaves are crushed and macerated in water, drunk | Opportunistic infections associated with HIV-AIDS, Oral thrush [53, 57, 65, 80, 82, 83].                                             | 6 |
| <b>Sapotaceae</b>  | <i>Englerophytum magalismontanum</i> (Sond.) T.D.Penn.             | SH | Roots; Amanumbela (Z); Milkplum (E); Mohlatswa (S), Munombelo (Tsh), Stamvrug (A)                                                                                    | Boiled and taken orally                                | Unidentified STI s and impotence [65].                                                                                               | 1 |
|                    | <i>Mimusops caffra</i> E.Mey. ex A.DC.                             | T  | Roots; Amasethole (Z); Coastal Red Milkwood (E); Rooimelkhout (A)                                                                                                    | Boiled and taken orally                                | Gonorrhoea [44].                                                                                                                     | 1 |
|                    | <i>Mimusops zeyheri</i> Sond.                                      | T  | Roots, Monupudu (S); Mububulu (Tsh); Mutaladzi (Tsh); Red Milkwood (E); Rooimelkhout (A); Umbumbulu (Z)                                                              | Boiled and taken orally                                | Syphilis [19, 65].                                                                                                                   | 2 |
| <b>Solanaceae</b>  | <i>Capsicum annum</i> L. var <i>glabriusculum</i>                  | SH | Roots; fruits and leaves; Mutunbutumbula (Tsh)                                                                                                                       | Boiled and taken orally                                | Treat “divhu” [53].                                                                                                                  | 1 |

|  |                                                                              |    |                                                                                                                          |                                                                                              |                                                                                                                 |   |
|--|------------------------------------------------------------------------------|----|--------------------------------------------------------------------------------------------------------------------------|----------------------------------------------------------------------------------------------|-----------------------------------------------------------------------------------------------------------------|---|
|  | (Dunal.) Heiser & Pickersgill                                                |    |                                                                                                                          |                                                                                              |                                                                                                                 |   |
|  | <i>Capsicum frutescens</i> L.                                                | SH | Roots, fruit, and leaves; African Chilli (E); African Pepper (E); Natal Chilli (E); Red Pepper (E)                       | Not mentioned                                                                                | Treat “divhu” [53].                                                                                             | 1 |
|  | <i>Datura stramonium</i> L.                                                  | SH | Leaves; Zavhazavha (Tsh); Jimsonweed (E), Thornapple (E).                                                                | Not mentioned                                                                                | Various unidentified STIs, gonorrhoea, impotence [50, 71, 90, 91].                                              | 4 |
|  | <i>Nicotiana glauca</i> Graham                                               | SH | Roots; Tobacco tree (E); Wild tobacco (E)                                                                                | Crushed and boiled                                                                           | Gonorrhoea and syphilis [51].                                                                                   | 1 |
|  | <i>Solanum aculeastrum</i> Dunal subsp. <i>aculeastrum</i>                   | H  | Fruits; Goat Bitter Apple (E); Intuma (Z); Umthuma (Z); Murulwa (Tsh); Poison-apple (E); Shulwa (Tsh)                    | Boiled and taken orally                                                                      | General STIs [49, 61].                                                                                          | 2 |
|  | <i>Solanum campylacanthum</i> Hochst. ex. A.Rich. subsp. <i>panduriforme</i> | H  | Roots; Bitter Apple (E); Bitterappel (A); Intuma (Z); Intuma-omncane (Z); Moralane (S); Morolwana (S); Poison Apple (E); | Boiled and taken orally                                                                      | Gonorrhoea and “divhu” [53].                                                                                    | 1 |
|  | <i>Solanum catombelense</i> Peyr.                                            | SH | Roots; Morola o monnyane (S)                                                                                             | Decoction taken orally                                                                       | Chlamydia [59].                                                                                                 | 1 |
|  | <i>Solanum elaeagnifolium</i> Cav.                                           | SH | Roots or stems; Morola (S)                                                                                               | Bioled and taken orally. In case of genital sores, its applied topically mixed with Vaseline | Gonorrhoea, chlamydia, syphilis, genital warts, and opportunistic infections associated with HIV-AIDS [51, 52]. | 2 |

|                       |                                                                                 |    |                                                                                                                                 |                                                                          |                                                                                                                    |    |
|-----------------------|---------------------------------------------------------------------------------|----|---------------------------------------------------------------------------------------------------------------------------------|--------------------------------------------------------------------------|--------------------------------------------------------------------------------------------------------------------|----|
|                       | <i>Solanum linnaeanum</i><br>Hepper & Jaeger                                    | SH | Roots; Bitter Apple (E)                                                                                                         | Boiled and<br>taken orally                                               | Gonorrhoea [93].                                                                                                   | 1  |
|                       | <i>Solanum nigrum</i> L.                                                        | H  | Fruit; Muxe (Tsh)                                                                                                               | Green berries<br>are pounded<br>and mixed with<br>water, taken<br>orally | Opportunistic infections<br>associated with HIV-AIDS<br>[57].                                                      | 1  |
|                       | <i>Solanum mauritianum</i><br>Scop.                                             | SH | Roots; Bugweed (E);<br>Morola (S)                                                                                               | Boiled and<br>taken orally                                               | Gonorrhoea, chlamydia,<br>syphilis, “makgoma” and<br>opportunistic infections<br>associated with HIV-AIDS<br>[51]. | 1  |
|                       | <i>Solanum panduriforme</i><br>E. Mey.                                          | H  | Fruits; Thola e serolwane<br>(S); Morolwana (S);<br>Ndhulwani (Tsh);<br>Intumemncane (Z)                                        | Chopped and<br>macerated in<br>water and taken<br>orally                 | Gonorhea and opportunistic<br>infections associated with<br>HIV-AIDS [45, 49, 57, 62, 64,<br>65, 71, 73, 79, 83].  | 10 |
|                       | <i>Withania somnifera</i> (L.)<br>Dunal.                                        | H  | Roots; Mosalamaropeng<br>(S); Bofepha (S);<br>Musalamarumbini (Tsh);<br>Ubuvimbha (Z)                                           | Boiled and<br>taken orally                                               | “Divhu”, syphilis and mouth<br>ulcers associated with HIV-<br>AIDS [53, 57, 91, 92].                               | 4  |
| <b>Strelitziaceae</b> | <i>Strelitzea reginae</i> Ait                                                   | SH | Leaves; Bird-of-paradise<br>Flower (E); Crane Flower<br>(E); Geelpiesang (A);<br>Piesangboom (A); Voëls<br>(A), Wild Banana (E) | Boiled and<br>drunk                                                      | Various unidentified STIs [38,<br>89].                                                                             | 2  |
| <b>Thymelaceae</b>    | <i>Lasiosiphon kraussianus</i><br>(Meisn.) Burt Davy<br>var. <i>kraussianus</i> | H  | Whole plant; Inhlashane<br>(Z); Isidikili (Z); Lesser<br>Yellowhead (E); Thopa S)<br>Umfukuzane (Z);<br>Umsilawengwe (Z)        | Not mentioned                                                            | Impotence [61].                                                                                                    | 1  |



|                    |                                                |   |                                                                                                                                                                     |                                      |                                                            |   |
|--------------------|------------------------------------------------|---|---------------------------------------------------------------------------------------------------------------------------------------------------------------------|--------------------------------------|------------------------------------------------------------|---|
| <b>Typhacaceae</b> | <i>Typha capensis</i> (Rohrb.) N.E.Br.         | H | Roots; Bulrush (E); Cat's Tail (E); Cossack Asparagus (E); Ibhumu (Z); Ingcongolo (X); Matjiesgoed (A); Motsitla (S)                                                | Decoction is drunk three times a day | Various unidentified STIS, impotence [38, 61, 89, 90, 91]. | 5 |
| <b>Ulmaceae</b>    | <i>Celtis africana</i> Burm.f.                 | T | Roots; Modutu (S); Mogatakomo (S); Mothibadifate (S); Mpopana (Tsh); Mumvumvu (Tsh); Ndwandwazane (Z); Umvumvu (Z); Umvumvu (X), Waterboom (A); White Stinkwood (E) | Boiled and taken orally              | Impotence in men [73].                                     | 1 |
| <b>Utricaceae</b>  | <i>Obetia tenax</i> (N.E.Br.) Friis            | T | Stem bark; Dyambila (Tsh); Gukhunya (Tsh); Imbati (Z); Impongozembe (Z); Lebati (S); Mountain Nettle (E); Muendanathavha (Tsh); Uluza (X)                           | Not mentioned                        | General STIs [49].                                         | 1 |
|                    | <i>Urtica dioica</i> L.                        | H | Stem and leaves; Bobatsi (S); Brandnekel (A); Common Nettle (E); Great Nettle (E); Stinging Nettle (E); Swedish Hemp (E); Umbabazane (X)                            | Boiled and taken orally              | Opportunistic infections associated with HIV-AIDS [9].     | 1 |
| <b>Verbenaceae</b> | <i>Clerodendron glabrum</i> var <i>glabrum</i> | T | Roots and stem bark; Mutsho (S)                                                                                                                                     | Boiled and taken orally              | Oral candidiasis [57, 58].                                 | 2 |

|                       |                                                            |    |                                                                                                                              |                                                    |                                                                                                              |   |
|-----------------------|------------------------------------------------------------|----|------------------------------------------------------------------------------------------------------------------------------|----------------------------------------------------|--------------------------------------------------------------------------------------------------------------|---|
|                       | <i>Lantana camara</i> L.                                   | SH | Leaves and twigs; Semela nageng (S); Mogwagwaila (S)                                                                         | Crushed and boiled, taken orally                   | Chlamydia, gonorrhoea, syphilis, and opportunistic infections associated with HIV-AIDS [51].                 | 1 |
|                       | <i>Lippia javanica</i>                                     | H  | Whole plant; Bokhukhwane (S); Fever Tea (E); Inzininiba (X); Koorsbossie (A); Koorsteebossie (A); Umsuzwane (Z); Umswazi (Z) | Decoction of a plant is used to wash infected area | Pubic lice [61, 91].                                                                                         | 2 |
|                       | <i>Phyla nodiflora</i> (L.) Greene                         | H  | Roots; Tshishengelaphofu (Tsh)                                                                                               | Chewed and spit out                                | Oral thrush associated with HIV-AIDS [54].                                                                   | 1 |
| <b>Violaceae</b>      | <i>Rinorea angustifolia</i> (Thouars) Baill.               | SH | Roots; Mafambaborile (Tsh); Narrow-leaved Violet-bush (E)                                                                    | Boiled and taken orally                            | General opportunistic infections associated with HIV-AIDS [57].                                              | 1 |
| <b>Vitaceae</b>       | <i>Cissus quadrangularis</i> L. var. <i>quadrangularis</i> | H  | Stem bark; Mohlabadipoo (S); Cactus vine (E); Umnhlonhlwanyane (Z)                                                           | Boiled and taken orally                            | Various unidentified STIs and skin infections associated with HIV-AIDS [19, 66, 89].                         | 3 |
|                       | <i>Rhoicissus tridendata</i> (L.f.) Wild & R.B.Drumm.      | SH | Roots; Terbe ya naga (S)                                                                                                     | Not mentioned                                      | Various unidentified STIs and against impotence [53, 76, 87, 88].                                            | 4 |
| <b>Zingiberaceae</b>  | <i>Siphonochilus aethiopicus</i> (Schweinf.) B.L.Burt      | H  | Bulb; Indungulu (Z); Isiphephetho (Z); Wild Ginger (E)                                                                       | Not mentioned                                      | Various unidentified STIs [75].                                                                              | 1 |
| <b>Zygophyllaceae</b> | <i>Tribulus terrestris</i> L.                              | SH | Whole plant, Mosehlo (S), Tsetwana (TSH); Puncture Vine (E)                                                                  | Not mentioned                                      | Roots are used to treat chlamydia or “go khutlega” while whole plant is used to treat syphilis [65, 79, 83]. | 3 |

Key: A, Afrikaans; E, English; Tsh, TshiVenda; Z, IsiZulu; X, IsiXhosa; S, Sepedi; Tsh, TshiVenda, ND, Ndebele; Ts, Tswana
